# Supplementary material
Source: publisher figshare collection journal article supplement (https://gsajournals.figshare.com/ndownloader/files/35373778)
Supplement: Supplementary file 1 [file 35373778]

## Sheet: Supplementary Table S10
Supplementary Table S10. Genomic information (B73 RefGen_v4) for the top 0.5% of genes identified in the transcriptome-wide association study
Phenotype	Gene ID	Chr	Gene start	Gene end	Gene strand	Gene name	Gene description	Gene type	Gene biotype	TWAS P-value	TWAS rank	TWAS ranking %	a priori candidate gene	Ames GWAS locus number	Ames GWAS peak SNP FDR-adjusted P-values	GWAS SNP rank	GWAS SNP ranking %	Distance of SNP to gene start (bp)	Distance of SNP to gene end (bp)	NAM JL-QTL CSI ID	NAM JL-QTL traits	NAM gwas peak SNP	NAM GWAS RMIP	NAM GWAS SNP to gene start	NAM GWAS SNP to gene end
αT	Zm00001d017746	5	205825586	205829216	+	vitamin E synthesis4	vitamin E synthesis4	gene	protein_coding	8.22e-23	1	0.00451753	Yes	αT_1	5.47e-88	1	8.32041e-06	955	-2675	NAM_JL_28	αT, γT, αT3, γT3	5_205828139	0.98	2553	-1077
αT	Zm00001d017720	5	205181529	205188957	-		DNA topoisomerase 2	gene	protein_coding	1.08e-07	2	0.00903506								NAM_JL_28	αT, γT, αT3, γT3	5_205828139	0.98	646610	639182
αT	Zm00001d027937	1	17977813	17985594	+		Pentatricopeptide repeat-containing protein	gene	protein_coding	3.75e-07	3	0.0135526								NAM_JL_2	γT, δT3
αT	Zm00001d017719	5	205105870	205106370	+		60S ribosomal protein L12-3	gene	protein_coding	7.78e-07	4	0.0180701								NAM_JL_28	αT, γT, αT3, γT3	5_205828139	0.98	722269	721769
αT	Zm00001d017761	5	206061161	206062765	+			gene	protein_coding	1.98e-05	5	0.0225876								NAM_JL_28	αT, γT, αT3, γT3	5_205828139	0.98	-233022	-234626
αT	Zm00001d017713	5	205042879	205045991	+		Protein NRT1/ PTR FAMILY 8.3	gene	protein_coding	2.28e-05	6	0.0271052								NAM_JL_28	αT, γT, αT3, γT3	5_205828139	0.98	785260	782148
αT	Zm00001d028745	1	45169934	45171167	-		Rhodanese-like family protein	gene	protein_coding	7.79e-05	7	0.0316227
αT	Zm00001d017787	5	206752152	206757266	-		Monodehydroascorbate reductase 4 peroxisomal	gene	protein_coding	0.000107485	8	0.0361402
αT	Zm00001d017830	5	208016509	208023474	-		Pyrophosphate--fructose 6-phosphate 1-phosphotransferase subunit alpha 2	gene	protein_coding	0.000133387	9	0.0406578								NAM_JL_29	δT, δT3, ΣTT3
αT	Zm00001d011543	8	154129779	154130258	-		Grx_I1-glutaredoxin subgroup III	gene	protein_coding	0.000145586	10	0.0451753
αT	Zm00001d031669	1	198137582	198141658	+		O-fucosyltransferase family protein	gene	protein_coding	0.000168791	11	0.0496928
αT	Zm00001d016933	5	180363906	180366525	+		loricrin-related	gene	protein_coding	0.000172151	12	0.0542103
αT	Zm00001d023368	10	4183914	4190591	-		TLC ATP/ADP transporter	gene	protein_coding	0.00018413	13	0.0587279
αT	Zm00001d042567	3	172184190	172187136	+		RNA polymerase III RPC4	gene	protein_coding	0.000193463	14	0.0632454
αT	Zm00001d038576	6	160345574	160353313	+		Calcium-transporting ATPase 4 plasma membrane-type	gene	protein_coding	0.000197521	15	0.0677629
αT	Zm00001d018904	7	8852939	8858814	+		protein kinase-related	gene	protein_coding	0.00025564	16	0.0722804
αT	Zm00001d033657	1	269826656	269833553	-		Histone acetyltransferase type B catalytic subunit	gene	protein_coding	0.000318379	17	0.076798
αT	Zm00001d013937	5	25431430	25434346	-	GRMZM2G073351	Protochlorophyllide reductase C chloroplastic	gene	protein_coding	0.000368542	18	0.0813155	Yes							NAM_JL_24	αT, δT, γT, ΣT, δT3, γT3, ΣTT3	5_25549803	0.17	118373	115457
αT	Zm00001d034073	1	283193730	283197425	-	WRKY-transcription factor 30	Probable WRKY transcription factor 57	gene	protein_coding	0.000380511	19	0.085833
αT	Zm00001d045162	9	14780005	14781306	+	MYB-related-transcription factor 19	Putative MYB DNA-binding domain superfamily protein	gene	protein_coding	0.000381785	20	0.0903506
αT	Zm00001d028380	1	32678385	32692019	+	MYB-related-transcription factor 59	TSL-kinase interacting protein 1	gene	protein_coding	0.000384032	21	0.0948681								NAM_JL_3	αT, δT, γT, ΣT, αT3, ΣTT3	1_32052500	0.33	-625885	-639519
αT	Zm00001d016736	5	174721846	174726025	-		2-Cys peroxiredoxin BAS1 chloroplastic	gene	protein_coding	0.000525189	22	0.0993856
αT	Zm00001d052163	4	181546231	181550988	+		Protein DCL chloroplastic	gene	protein_coding	0.000527718	23	0.103903
αT	Zm00001d001980	2	3876007	3880702	+		Protein kinase-like	gene	protein_coding	0.000574908	24	0.108421
αT	Zm00001d010574	8	120713490	120716661	+	CCAAT-DR1-transcription factor 15	Nuclear transcription factor Y subunit B-8	gene	protein_coding	0.000631671	25	0.112938
αT	Zm00001d013519	5	13440457	13446073	+		Protein UPSTREAM OF FLC	gene	protein_coding	0.000649213	26	0.117456
αT	Zm00001d017756	5	206004272	206007539	-		Syntaxin-22	gene	protein_coding	0.000654916	27	0.121973								NAM_JL_28	αT, γT, αT3, γT3	5_205828139	0.98	-176133	-179400
αT	Zm00001d017998	5	211658453	211660266	-			gene	protein_coding	0.000694583	28	0.126491
αT	Zm00001d033296	1	257976128	257981309	+		Protein DETOXIFICATION 35	gene	protein_coding	0.00069953	29	0.131008								NAM_JL_6	αT3
αT	Zm00001d037340	6	122064078	122065011	-			gene	protein_coding	0.000743162	30	0.135526								NAM_JL_31	δT, γT, ΣT, αT3, δT3, ΣTT3
αT	Zm00001d003497	2	46058114	46059373	+		RING-H2 finger protein ATL54	gene	protein_coding	0.000760613	31	0.140043								NAM_JL_10	δT, γT, αT3, γT3, ΣT3
αT	Zm00001d017717	5	205082975	205085670	+		ADP-ribosylation factor B1B	gene	protein_coding	0.00079518	32	0.144561								NAM_JL_28	αT, γT, αT3, γT3	5_205828139	0.98	745164	742469
αT	Zm00001d017643	5	202957210	202960229	-		Catalytic/ protein phosphatase type 2C	gene	protein_coding	0.000853087	33	0.149078
αT	Zm00001d012931	5	2173189	2178440	-		Protein kinase protein with tetratricopeptide repeat domain	gene	protein_coding	0.000900736	34	0.153596								NAM_JL_23	δT3, ΣTT3
αT	Zm00001d023313	10	2769149	2772367	+		BTB/POZ domain-containing protein	gene	protein_coding	0.00101796	35	0.158113
αT	Zm00001d010617	8	122038132	122039596	-	WRKY-transcription factor 44	Putative WRKY DNA-binding domain superfamily protein	gene	protein_coding	0.00103328	36	0.162631								NAM_JL_41	αT, γT, ΣT, δT3, ΣTT3	8_145705858	0.06	23667726	23666262
αT	Zm00001d002021	2	4539076	4539570	+			gene	protein_coding	0.00104578	37	0.167149
αT	Zm00001d028045	1	21501810	21527021	+		Mannose-1-phosphate guanylyltransferase 1	gene	protein_coding	0.00109507	38	0.171666								NAM_JL_2	γT, δT3
αT	Zm00001d017952	5	210781408	210782962	+		ABA-induced protein	gene	protein_coding	0.00111113	39	0.176184								NAM_JL_29	δT, δT3, ΣTT3
αT	Zm00001d007903	2	242089363	242106674	+		Aspartic proteinase A1	gene	protein_coding	0.00112411	40	0.180701
αT	Zm00001d017493	5	197521765	197523503	+		Expansin-B4	gene	protein_coding	0.00113711	41	0.185219								NAM_JL_27	δT
αT	Zm00001d039252	3	563497	566145	+		cAMP-regulated phosphoprotein 19-related protein	gene	protein_coding	0.00115511	42	0.189736
αT	Zm00001d046001	9	53138576	53140508	+		Triose phosphate/phosphate translocator TPT chloroplastic	gene	protein_coding	0.0011765	43	0.194254								NAM_JL_45	αT, δT, γT, ΣT, αT3, δT3, γT3, ΣT3, ΣTT3	9_30731061	0.71	-22407515	-22409447
αT	Zm00001d010585	8	121006820	121019315	+		UTP--glucose-1-phosphate uridylyltransferase 3 chloroplastic	gene	protein_coding	0.00117746	44	0.198771								NAM_JL_41	αT, γT, ΣT, δT3, ΣTT3	8_145705858	0.06	24699038	24686543
αT	Zm00001d031778	1	201515268	201517431	-		Carbonic anhydrase	gene	protein_coding	0.00117993	45	0.203289
αT	Zm00001d032192	1	216390881	216396455	+		AP-3 complex subunit mu	gene	protein_coding	0.00122413	46	0.207806
αT	Zm00001d033363	1	260339350	260340132	+		Zinc finger protein 1	gene	protein_coding	0.00124246	47	0.212324								NAM_JL_6	αT3
αT	Zm00001d006658	2	213741901	213749883	+		Glucan endo-13-beta-glucosidase 4	gene	protein_coding	0.00125157	48	0.216841
αT	Zm00001d016735	5	174689200	174692440	-		Protein SMAX1-LIKE 3	gene	protein_coding	0.00129117	49	0.221359
αT	Zm00001d006052	2	196575825	196581941	+		myosin heavy chain-related	gene	protein_coding	0.00132834	50	0.225876								NAM_JL_11	γT, ΣT, ΣTT3
αT	Zm00001d003002	2	29217388	29229681	-		IAA-amino acid hydrolase ILR1-like 3	gene	protein_coding	0.00134866	51	0.230394								NAM_JL_9	ΣT
αT	Zm00001d038718	6	163324435	163325813	-	hemoglobin2	hemoglobin2	gene	protein_coding	0.00135064	52	0.234911								NAM_JL_33	δT, γT, ΣT, αT3, δT3
αT	Zm00001d042848	3	181947006	181957835	-		Laccase-7	gene	protein_coding	0.0013548	53	0.239429								NAM_JL_17	ΣTT3
αT	Zm00001d032498	1	228418762	228431630	+		Tubulin-folding cofactor D	gene	protein_coding	0.00143674	54	0.243947								NAM_JL_5	αT, δT, γT, ΣT, δT3, γT3, ΣTT3	1_239029216	0.06	10610454	10597586
αT	Zm00001d000241	B73V4_ctg11	49629	52020	+		Single-stranded DNA-binding protein mitochondrial	gene	protein_coding	0.00146101	55	0.248464
αT	Zm00001d020392	7	111021187	111023397	-		Probable xyloglucan endotransglucosylase/hydrolase protein 28	gene	protein_coding	0.00149185	56	0.252982
αT	Zm00001d032220	1	217631090	217658099	-			gene	protein_coding	0.00152347	57	0.257499
αT	Zm00001d012601	8	177056647	177058840	+		RNA-binding KH domain-containing protein	gene	protein_coding	0.0016113	58	0.262017
αT	Zm00001d044099	3	219075378	219082694	-	carbonic anhydrase1	carbonic anhydrase1	gene	protein_coding	0.00172451	59	0.266534
αT	Zm00001d031264	1	184285253	184286332	+		Cupin%252C RmlC-type	gene	protein_coding	0.0017982	60	0.271052
αT	Zm00001d003104	2	32315043	32316371	-		Protein binding protein	gene	protein_coding	0.00181446	61	0.275569								NAM_JL_10	δT, γT, αT3, γT3, ΣT3
αT	Zm00001d017751	5	205889941	205895577	+	organelle transcript processing51	Pentatricopeptide repeat-containing protein chloroplastic	gene	protein_coding	0.00186467	62	0.280087		αT_1	5.47e-88	1	8.32041e-06	-63400	-69036	NAM_JL_28	αT, γT, αT3, γT3	5_205828139	0.98	-61802	-67438
αT	Zm00001d045505	9	24930065	24935418	+		LIMR family protein	gene	protein_coding	0.00188602	63	0.284604
αT	Zm00001d033054	1	248749513	248754550	-		Protein FATTY ACID EXPORT 5	gene	protein_coding	0.00189234	64	0.289122
αT	Zm00001d042479	3	169008960	169014820	+		DNA repair protein recA homolog 3 mitochondrial	gene	protein_coding	0.00190212	65	0.293639								NAM_JL_15	αT	3_162249451	0.65	-6759509	-6765369
αT	Zm00001d038127	6	148802708	148805989	-		Probable E3 ubiquitin-protein ligase LUL4	gene	protein_coding	0.00193942	66	0.298157								NAM_JL_32	αT, γT3, ΣT3, ΣTT3	6_142123282	0.28	-6679426	-6682707
αT	Zm00001d032019	1	209574119	209576739	+	acyl carrier protein1	acyl carrier protein1	gene	protein_coding	0.00195275	67	0.302674
αT	Zm00001d044566	3	231819259	231877498	+		Callose synthase 7	gene	protein_coding	0.00198116	68	0.307192								NAM_JL_19	αT3
αT	Zm00001d012381	8	173254406	173259963	-			gene	protein_coding	0.00201147	69	0.311709
αT	Zm00001d033456	1	263158766	263160067	-			gene	protein_coding	0.00209634	70	0.316227								NAM_JL_6	αT3
αT	Zm00001d017874	5	209352390	209357003	-		LORELEI-LIKE-GPI ANCHORED PROTEIN 3	gene	protein_coding	0.00219564	71	0.320744								NAM_JL_29	δT, δT3, ΣTT3
αT	Zm00001d009827	8	84137550	84142965	-		Cold-regulated 413 inner membrane protein 2 chloroplastic	gene	protein_coding	0.0022476	72	0.325262
αT	Zm00001d013086	5	4528425	4530419	+		40S ribosomal protein S18	gene	protein_coding	0.00226109	73	0.32978
αT	Zm00001d009726	8	77933762	77941132	-		alpha/beta-Hydrolases superfamily protein	gene	protein_coding	0.00243605	74	0.334297
αT	Zm00001d016155	5	147482562	147503560	-		Putative callose synthase 8	gene	protein_coding	0.00250909	75	0.338815								NAM_JL_26	δT, γT, ΣT, δT3, γT3, ΣT3, ΣTT3
αT	Zm00001d035629	6	37509032	37510146	-		Actin-depolymerizing factor 4	gene	protein_coding	0.00253267	76	0.343332								NAM_JL_30	γT, ΣT, δT3, γT3, ΣT3, ΣTT3
αT	Zm00001d008642	8	15546442	15549289	+		Serine carboxypeptidase-like 27	gene	protein_coding	0.00254996	77	0.34785
αT	Zm00001d014436	5	46815072	46820700	+		26S proteasome non-ATPase regulatory subunit 13 homolog A	gene	protein_coding	0.00258345	78	0.352367								NAM_JL_25	αT3, ΣT3
αT	Zm00001d017526	5	198707054	198710453	+	plasma membrane intrinsic protein1	Aquaporin PIP1-2	gene	protein_coding	0.00261299	79	0.356885								NAM_JL_27	δT
αT	Zm00001d044418	3	227499878	227503129	+		Ubiquitin-conjugating enzyme family protein	gene	protein_coding	0.0026219	80	0.361402
αT	Zm00001d014862	5	66015077	66024385	+		Calcium-binding EF hand family protein	gene	protein_coding	0.00268311	81	0.36592								NAM_JL_25	αT3, ΣT3
αT	Zm00001d003846	2	61944273	61948903	+		Mitochondrial import inner membrane translocase subunit Tim17/Tim22/Tim23 family protein	gene	protein_coding	0.00268945	82	0.370437								NAM_JL_10	δT, γT, αT3, γT3, ΣT3
αT	Zm00001d016463	5	163215272	163224552	+		7-dehydrocholesterol reductase	gene	protein_coding	0.00272236	83	0.374955								NAM_JL_26	δT, γT, ΣT, δT3, γT3, ΣT3, ΣTT3
αT	Zm00001d003924	2	68550654	68555257	-		Glycerophosphodiester phosphodiesterase GDPD2	gene	protein_coding	0.00273406	84	0.379472								NAM_JL_10	δT, γT, αT3, γT3, ΣT3
αT	Zm00001d021868	7	164951419	164954177	+		COMPASS-like H3K4 histone methylase component WDR5B	gene	protein_coding	0.00273447	85	0.38399
αT	Zm00001d035200	6	9608412	9611522	-		Putative AMP-dependent synthetase and ligase superfamily protein	gene	protein_coding	0.0027659	86	0.388507
αT	Zm00001d008715	8	17616001	17619880	+		Putative leucine-rich repeat receptor protein kinase family protein	gene	protein_coding	0.00277774	87	0.393025
αT	Zm00001d049606	4	37194347	37198546	-		Pentatricopeptide repeat-containing protein chloroplastic	gene	protein_coding	0.00288337	88	0.397542								NAM_JL_21	δT, γT, ΣT, αT3, δT3, γT3, ΣT3, ΣTT3
αT	Zm00001d005978	2	194543937	194544415	-	xerico1	RING-H2 finger protein	gene	protein_coding	0.00291864	89	0.40206								NAM_JL_11	γT, ΣT, ΣTT3
αT	Zm00001d011459	8	150993826	150996995	+		Protein HYPER-SENSITIVITY-RELATED 4	gene	protein_coding	0.00294185	90	0.406578
αT	Zm00001d009716	8	77435891	77440466	+		Extra-large G-protein-like%3B protein	gene	protein_coding	0.00296143	91	0.411095
αT	Zm00001d016744	5	174760901	174762607	-			gene	protein_coding	0.00298228	92	0.415613
αT	Zm00001d017468	5	196756823	196759479	+		DeSI-like protein	gene	protein_coding	0.00304974	93	0.42013								NAM_JL_27	δT
αT	Zm00001d019414	7	32841070	32842462	-		Cytochrome P450 71B10	gene	protein_coding	0.00308527	94	0.424648								NAM_JL_36	δT, αT3, δT3
αT	Zm00001d017793	5	206964939	206969131	-		Kinesin light chain	gene	protein_coding	0.00317793	95	0.429165
αT	Zm00001d003158	2	33988459	33990760	+			gene	protein_coding	0.00318144	96	0.433683								NAM_JL_10	δT, γT, αT3, γT3, ΣT3
αT	Zm00001d019312	7	27241848	27243532	-	beta glucosidase aggregating factor1	beta glucosidase aggregating factor1	gene	protein_coding	0.00322466	97	0.4382								NAM_JL_36	δT, αT3, δT3
αT	Zm00001d028122	1	23497185	23499077	+			gene	protein_coding	0.00322497	98	0.442718
αT	Zm00001d017748	5	205851491	205853476	+		3-dehydrosphinganine reductase TSC10B	gene	protein_coding	0.00325567	99	0.447235		αT_1	5.47e-88	1	8.32041e-06	-24950	-26935	NAM_JL_28	αT, γT, αT3, γT3	5_205828139	0.98	-23352	-25337
αT	Zm00001d052901	4	204071169	204075125	-		AT-hook motif nuclear-localized protein 10	gene	protein_coding	0.00332926	100	0.451753
αT	Zm00001d017141	5	186720984	186723755	-			gene	protein_coding	0.00343824	101	0.45627
αT	Zm00001d008374	8	6699139	6703444	+		Sugar transporter ERD6-like 3	gene	protein_coding	0.00375869	102	0.460788
αT	Zm00001d009103	8	36535940	36537052	+	AP2-EREBP-transcription factor 148	Ethylene-responsive factor-like protein 1%253B Putative AP2/EREBP transcription factor superfamily protein	gene	protein_coding	0.00392156	103	0.465305
αT	Zm00001d033611	1	268584129	268588402	-		Alkaline phytoceramidase (aPHC)	gene	protein_coding	0.00393017	104	0.469823
αT	Zm00001d044874	9	6096248	6097444	+		23.6 kDa heat shock protein mitochondrial	gene	protein_coding	0.00398901	105	0.47434
αT	Zm00001d044895	9	6587251	6589339	-		ATPase%252C coupled to transmembrane movement of substance	gene	protein_coding	0.00408355	106	0.478858
αT	Zm00001d011734	8	160235115	160235972	-		Inorganic pyrophosphatase 1	gene	protein_coding	0.00408399	107	0.483375
αT	Zm00001d053663	4	238377007	238380691	+		Fumarylacetoacetase	gene	protein_coding	0.00409384	108	0.487893	Yes
αT	Zm00001d017470	5	196852395	196857257	-		alpha/beta-Hydrolases superfamily protein	gene	protein_coding	0.00410065	109	0.492411								NAM_JL_27	δT
αT	Zm00001d042965	3	185081743	185087745	-		Nucleic acid binding protein	gene	protein_coding	0.00411293	110	0.496928								NAM_JL_17	ΣTT3
αT3	Zm00001d017746	5	205825586	205829216	+	vitamin E synthesis4	vitamin E synthesis4	gene	protein_coding	4.1e-07	1	0.00451753	Yes	αT3_31	7.11e-28	1	8.32041e-06	2569	-1061	NAM_JL_28	αT, γT, αT3, γT3	5_205823498	0.88	-2088	-5718
αT3	Zm00001d002256	2	9055230	9066450	+		Starch synthase 3 chloroplastic/amyloplastic	gene	protein_coding	0.000116386	2	0.00903506
αT3	Zm00001d011646	8	157428446	157432723	-			gene	protein_coding	0.000229683	3	0.0135526
αT3	Zm00001d039315	3	1533825	1541740	+		P-loop containing nucleoside triphosphate hydrolases superfamily protein	gene	protein_coding	0.000255209	4	0.0180701
αT3	Zm00001d021898	7	165620035	165624084	-	recombination protein51 gene a	recombination protein51 gene a	gene	protein_coding	0.00029188	5	0.0225876
αT3	Zm00001d046628	9	99609772	99613284	-			gene	protein_coding	0.000295471	6	0.0271052								NAM_JL_45	αT, δT, γT, ΣT, αT3, δT3, γT3, ΣT3, ΣTT3	9_92908442	0.79	-6701330	-6704842
αT3	Zm00001d002429	2	12492416	12496032	+	GRF-transcription factor 8	Putative growth-regulating factor 6	gene	protein_coding	0.000295757	7	0.0316227
αT3	Zm00001d017862	5	209091060	209095479	+	PHD-transcription factor 22	RING/FYVE/PHD zinc finger superfamily protein	gene	protein_coding	0.000341899	8	0.0361402								NAM_JL_29	δT, δT3, ΣTT3
αT3	Zm00001d040958	3	83071425	83074361	+		glucose-inhibited division family A protein	gene	protein_coding	0.000409801	9	0.0406578								NAM_JL_14	αT3, δT3, γT3, ΣT3	3_146261139	0.08	63189714	63186778
αT3	Zm00001d029027	1	55241838	55244510	+	ycf54 homolog	ycf54 homolog	gene	protein_coding	0.000426895	10	0.0451753
αT3	Zm00001d030937	1	168391020	168397836	+		Protein kinase superfamily protein with octicosapeptide/Phox/Bem1p domain	gene	protein_coding	0.000432097	11	0.0496928								NAM_JL_4	δT, δT3, γT3, ΣT3, ΣTT3
αT3	Zm00001d044094	3	218986506	218988848	-		Exostosin family protein	gene	protein_coding	0.000440372	12	0.0542103
αT3	Zm00001d016933	5	180363906	180366525	+		loricrin-related	gene	protein_coding	0.000501397	13	0.0587279
αT3	Zm00001d039240	3	383141	383997	+		ABA induced plasma membrane protein PM 19	gene	protein_coding	0.0005339	14	0.0632454
αT3	Zm00001d006365	2	205733931	205735679	-		Probable aldo-keto reductase 4	gene	protein_coding	0.000636157	15	0.0677629								NAM_JL_11	γT, ΣT, ΣTT3
αT3	Zm00001d045358	9	19517757	19531682	+		Nuclear speckle RNA-binding protein A	gene	protein_coding	0.000650411	16	0.0722804								NAM_JL_44	PC8
αT3	Zm00001d045027	9	10607821	10611813	+		3-oxoacyl-[acyl-carrier-protein] synthase I chloroplastic	gene	protein_coding	0.000701272	17	0.076798
αT3	Zm00001d001967	2	3611983	3617038	+		Mediator of RNA polymerase II transcription subunit 7a	gene	protein_coding	0.000703454	18	0.0813155
αT3	Zm00001d026235	10	141655206	141657151	+		scramblase-related	gene	protein_coding	0.000745905	19	0.085833
αT3	Zm00001d035717	6	42705454	42708241	+		WAT1-related protein	gene	protein_coding	0.000785193	20	0.0903506								NAM_JL_30	γT, ΣT, δT3, γT3, ΣT3, ΣTT3
αT3	Zm00001d001897	2	2547151	2550966	+		SEC-C motif-containing protein / OTU-like cysteine protease family protein	gene	protein_coding	0.000806146	21	0.0948681
αT3	Zm00001d021864	7	164880127	164883291	-		splicing factor Prp18 family protein	gene	protein_coding	0.000826493	22	0.0993856
αT3	Zm00001d013282	5	7809349	7811556	-		ribosomal protein S27c	gene	protein_coding	0.000891828	23	0.103903
αT3	Zm00001d017821	5	207742585	207746674	-		Probable L-type lectin-domain containing receptor kinase S.5	gene	protein_coding	0.000901439	24	0.108421								NAM_JL_29	δT, δT3, ΣTT3
αT3	Zm00001d003789	2	59384911	59386717	+		Ras-related protein RABD1	gene	protein_coding	0.000920375	25	0.112938								NAM_JL_10	δT, γT, αT3, γT3, ΣT3	2_42787017	0.09	-16597894	-16599700
αT3	Zm00001d016311	5	156652377	156668073	-		Metallopeptidase M24 family protein	gene	protein_coding	0.00092407	26	0.117456								NAM_JL_26	δT, γT, ΣT, δT3, γT3, ΣT3, ΣTT3
αT3	Zm00001d012381	8	173254406	173259963	-			gene	protein_coding	0.000968238	27	0.121973
αT3	Zm00001d012907	5	1842636	1843127	-		soluble epoxide hydrolase	gene	protein_coding	0.000985628	28	0.126491								NAM_JL_23	δT3, ΣTT3
αT3	Zm00001d017459	5	196472362	196475461	+			gene	protein_coding	0.00098624	29	0.131008								NAM_JL_27	δT
αT3	Zm00001d009472	8	66130625	66133282	+		5'-3' exoribonuclease 3	gene	protein_coding	0.00100482	30	0.135526
αT3	Zm00001d047852	9	143462591	143464189	+		BTB/POZ domain-containing protein	gene	protein_coding	0.00100866	31	0.140043
αT3	Zm00001d022554	7	179921907	179928103	-	umc168	BADH-like protein	gene	protein_coding	0.00101073	32	0.144561
αT3	Zm00001d045106	9	12889397	12891677	+			gene	protein_coding	0.00109806	33	0.149078
αT3	Zm00001d003658	2	52836039	52839059	+		Phosphoribosylglycinamide formyltransferase chloroplastic	gene	protein_coding	0.00113232	34	0.153596								NAM_JL_10	δT, γT, αT3, γT3, ΣT3	2_42787017	0.09	-10049022	-10052042
αT3	Zm00001d036023	6	66747951	66752670	-		cytochrome P450 family 704 subfamily A polypeptide 2	gene	protein_coding	0.00113846	35	0.158113								NAM_JL_30	γT, ΣT, δT3, γT3, ΣT3, ΣTT3
αT3	Zm00001d047633	9	137595058	137599928	-		Putative DEAD-box ATP-dependent RNA helicase family protein	gene	protein_coding	0.00116379	36	0.162631
αT3	Zm00001d050224	4	74614191	74625017	+		4-coumarate--CoA ligase 1	gene	protein_coding	0.00123449	37	0.167149								NAM_JL_21	δT, γT, ΣT, αT3, δT3, γT3, ΣT3, ΣTT3	4_84987490	0.32	10373299	10362473
αT3	Zm00001d035935	6	61216955	61219470	-			gene	protein_coding	0.0013205	38	0.171666								NAM_JL_30	γT, ΣT, δT3, γT3, ΣT3, ΣTT3
αT3	Zm00001d039918	3	19350843	19355642	+		cytochrome P450 family 77 subfamily A polypeptide 5 pseudogene	gene	protein_coding	0.00133295	39	0.176184								NAM_JL_13	γT, ΣT
αT3	Zm00001d049083	4	15479800	15486890	-		F-box protein SKIP16	gene	protein_coding	0.00133322	40	0.180701
αT3	Zm00001d033337	1	259493012	259496396	+		Protein OSB1 mitochondrial	gene	protein_coding	0.00133566	41	0.185219								NAM_JL_6	αT3	1_263072999	0.26	3579987	3576603
αT3	Zm00001d004784	2	139072783	139074023	+		Protein TPLATE	gene	protein_coding	0.00135836	42	0.189736								NAM_JL_10	δT, γT, αT3, γT3, ΣT3	2_42787017	0.09	-96285766	-96287006
αT3	Zm00001d009000	8	29485965	29488075	-		40S ribosomal protein S15a-1	gene	protein_coding	0.00136426	43	0.194254
αT3	Zm00001d036977	6	108070822	108076516	-		Nuclear poly(A) polymerase 2	gene	protein_coding	0.00137111	44	0.198771								NAM_JL_31	δT, γT, ΣT, αT3, δT3, ΣTT3	6_108337862	0.37	267040	261346
αT3	Zm00001d017427	5	195764467	195767455	-		Metal-nicotianamine transporter YSL2	gene	protein_coding	0.00138415	45	0.203289								NAM_JL_27	δT
αT3	Zm00001d048409	9	155778427	155783053	-		Cell division control protein 48 homolog D	gene	protein_coding	0.00146024	46	0.207806
αT3	Zm00001d049948	4	54772592	54776331	+		Uridine nucleosidase 1	gene	protein_coding	0.00149229	47	0.212324								NAM_JL_21	δT, γT, ΣT, αT3, δT3, γT3, ΣT3, ΣTT3	4_84987490	0.32	30214898	30211159
αT3	Zm00001d015037	5	72934800	72939876	-		Glutamate--tRNA ligase chloroplastic/mitochondrial	gene	protein_coding	0.00150671	48	0.216841								NAM_JL_25	αT3, ΣT3	5_62514918	0.22	-10419882	-10424958
αT3	Zm00001d048831	4	6084918	6088964	-			gene	protein_coding	0.00150845	49	0.221359
αT3	Zm00001d048154	9	151057136	151066838	-		Arabinanase/levansucrase/invertase	gene	protein_coding	0.00153417	50	0.225876								NAM_JL_47	δT
αT3	Zm00001d006906	2	219167948	219172957	+		Serine/arginine-rich splicing factor SC35	gene	protein_coding	0.0015768	51	0.230394		αT3_16	0.010514	731	0.00608222	51018	46009	NAM_JL_12	αT, δT, γT, ΣT, ΣTT3
αT3	Zm00001d010490	8	117575051	117587415	+		CW-type Zinc Finger	gene	protein_coding	0.00160213	52	0.234911
αT3	Zm00001d007783	2	239500396	239505004	-		P-loop containing nucleoside triphosphate hydrolases superfamily protein	gene	protein_coding	0.00165108	53	0.239429
αT3	Zm00001d033025	1	247651863	247656325	-		endonuclease/exonuclease/phosphatase family protein	gene	protein_coding	0.00169304	54	0.243947
αT3	Zm00001d032184	1	216043555	216047590	-		Hydrolase	gene	protein_coding	0.00176151	55	0.248464
αT3	Zm00001d018235	5	217143410	217145496	-			gene	protein_coding	0.0017816	56	0.252982
αT3	Zm00001d021867	7	164948984	164951369	-		splicing factor Prp18 family protein	gene	protein_coding	0.00179382	57	0.257499
αT3	Zm00001d053295	4	224781307	224784094	+		Ubiquitin-conjugating enzyme E2 variant 1C	gene	protein_coding	0.00180806	58	0.262017
αT3	Zm00001d002033	2	4807574	4809601	+			gene	protein_coding	0.00182611	59	0.266534
αT3	Zm00001d039727	3	13017991	13020628	-		phosphatidylinositolglycan-related	gene	protein_coding	0.00185151	60	0.271052
αT3	Zm00001d008251	8	2928345	2930423	+	MYB-transcription factor 60	Putative MYB DNA-binding domain superfamily protein	gene	protein_coding	0.00187995	61	0.275569
αT3	Zm00001d018604	7	627882	630942	+			gene	protein_coding	0.00190994	62	0.280087
αT3	Zm00001d018258	5	217527909	217540053	+	MYB-related-transcription factor 67	TRF-like 6	gene	protein_coding	0.00193847	63	0.284604
αT3	Zm00001d047694	9	139387993	139389339	+		Glycosyltransferase 5	gene	protein_coding	0.00213395	64	0.289122								NAM_JL_46	γT, ΣT
αT3	Zm00001d048450	9	156644486	156647221	-		Phosphatidylinositol-glycan biosynthesis class F protein	gene	protein_coding	0.00215161	65	0.293639
αT3	Zm00001d012577	8	176845974	176846168	+			gene	protein_coding	0.00234237	66	0.298157								NAM_JL_42	ΣT3
αT3	Zm00001d004927	2	149224009	149226714	+		Os12g0146300 protein	gene	protein_coding	0.0023623	67	0.302674								NAM_JL_10	δT, γT, αT3, γT3, ΣT3	2_42787017	0.09	-106436992	-106439697
αT3	Zm00001d034301	1	288811384	288825802	-			gene	protein_coding	0.00241642	68	0.307192
αT3	Zm00001d012848	5	1080944	1081672	+		SAM domain family protein	gene	protein_coding	0.00245474	69	0.311709								NAM_JL_23	δT3, ΣTT3
αT3	Zm00001d003495	2	46044805	46059398	-			gene	protein_coding	0.00248077	70	0.316227								NAM_JL_10	δT, γT, αT3, γT3, ΣT3	2_42787017	0.09	-3257788	-3272381
αT3	Zm00001d042433	3	167045705	167049086	+		Histone deacetylase HDT1	gene	protein_coding	0.00249957	71	0.320744								NAM_JL_15	αT
αT3	Zm00001d017643	5	202957210	202960229	-		Catalytic/ protein phosphatase type 2C	gene	protein_coding	0.00267089	72	0.325262
αT3	Zm00001d048318	9	154463094	154468191	+		Protoheme IX farnesyltransferase	gene	protein_coding	0.00267208	73	0.32978
αT3	Zm00001d017761	5	206061161	206062765	+			gene	protein_coding	0.00268503	74	0.334297								NAM_JL_28	αT, γT, αT3, γT3	5_205823498	0.88	-237663	-239267
αT3	Zm00001d018257	5	217516473	217524451	+			gene	protein_coding	0.00273667	75	0.338815
αT3	Zm00001d009848	8	84947841	84951081	+		60S ribosomal protein L18-3	gene	protein_coding	0.0027926	76	0.343332
αT3	Zm00001d037770	6	136860907	136863580	+		Phosphoribosylformylglycinamidine cyclo-ligase	gene	protein_coding	0.00280923	77	0.34785								NAM_JL_32	αT, γT3, ΣT3, ΣTT3
αT3	Zm00001d052871	4	203084837	203085460	+		WD-40 repeat-containing protein MSI5	gene	protein_coding	0.00287487	78	0.352367
αT3	Zm00001d004260	2	97679315	97692204	-		Actin-related protein 9	gene	protein_coding	0.0029395	79	0.356885								NAM_JL_10	δT, γT, αT3, γT3, ΣT3	2_42787017	0.09	-54892298	-54905187
αT3	Zm00001d001838	2	1675459	1681671	+	ABI3-VP1-transcription factor 3	B3 domain-containing transcription factor LEC2	gene	protein_coding	0.00296513	80	0.361402
αT3	Zm00001d045946	9	48773704	48775095	-		Protein MIZU-KUSSEI 1	gene	protein_coding	0.0029663	81	0.36592								NAM_JL_45	αT, δT, γT, ΣT, αT3, δT3, γT3, ΣT3, ΣTT3	9_92908442	0.79	44134738	44133347
αT3	Zm00001d012763	8	180226489	180258297	-	kinesin-related protein16	kinesin-related protein16	gene	protein_coding	0.00297414	82	0.370437								NAM_JL_43	αT3, δT3, γT3	8_178590006	0.26	-1636483	-1668291
αT3	Zm00001d013357	5	9460784	9464546	+	bHLH-transcription factor 154	Transcription factor bHLH62	gene	protein_coding	0.00303219	83	0.374955
αT3	Zm00001d013378	5	10021176	10022908	+		Maf-like protein	gene	protein_coding	0.00310511	84	0.379472
αT3	Zm00001d031454	1	190649919	190653721	-	MYB-related-transcription factor 103	DNA-binding bromodomain-containing protein	gene	protein_coding	0.00311031	85	0.38399
αT3	Zm00001d052675	4	196963480	196969861	+		Type III polyketide synthase B	gene	protein_coding	0.00325154	86	0.388507
αT3	Zm00001d034852	1	303812821	303814256	-		F3H9.20 protein	gene	protein_coding	0.00329423	87	0.393025
αT3	Zm00001d001830	2	1559610	1563496	-		Mediator of RNA polymerase II transcription subunit 9	gene	protein_coding	0.00334316	88	0.397542
αT3	Zm00001d012601	8	177056647	177058840	+		RNA-binding KH domain-containing protein	gene	protein_coding	0.00335627	89	0.40206
αT3	Zm00001d049455	4	30738463	30757168	-		Putative SNF2-domain/RING finger domain/helicase domain protein	gene	protein_coding	0.00336244	90	0.406578								NAM_JL_21	δT, γT, ΣT, αT3, δT3, γT3, ΣT3, ΣTT3	4_84987490	0.32	54249027	54230322
αT3	Zm00001d037650	6	132828573	132836981	-			gene	protein_coding	0.00353225	91	0.411095								NAM_JL_32	αT, γT3, ΣT3, ΣTT3
αT3	Zm00001d042225	3	156802050	156804169	+		Heavy metal transport/detoxification superfamily protein	gene	protein_coding	0.00366679	92	0.415613								NAM_JL_15	αT
αT3	Zm00001d005636	2	181459859	181465569	+		Proton pump-interactor 1	gene	protein_coding	0.00367404	93	0.42013
αT3	Zm00001d009962	8	92539196	92543525	-		Sas10/Utp3/C1D family	gene	protein_coding	0.00372128	94	0.424648
αT3	Zm00001d012232	8	170589813	170596332	+			gene	protein_coding	0.00372481	95	0.429165
αT3	Zm00001d052893	4	203852542	203856158	+		Protein EMSY-LIKE 4	gene	protein_coding	0.00374332	96	0.433683
αT3	Zm00001d047587	9	136381079	136391778	-	bZIP-transcription factor 105	Glucose-6-phosphate 1-dehydrogenase 4 chloroplastic	gene	protein_coding	0.00377203	97	0.4382
αT3	Zm00001d052873	4	203088415	203093168	+		SWIB complex BAF60b domain-containing protein	gene	protein_coding	0.00380336	98	0.442718
αT3	Zm00001d028755	1	45602342	45605011	-		Ran-binding protein 1 homolog a	gene	protein_coding	0.00385427	99	0.447235
αT3	Zm00001d052702	4	198185534	198190149	+		Biotin synthase	gene	protein_coding	0.00396616	100	0.451753
αT3	Zm00001d051778	4	169305662	169310746	-			gene	protein_coding	0.00400241	101	0.45627
αT3	Zm00001d040678	3	57611250	57618983	+			gene	protein_coding	0.00403322	102	0.460788								NAM_JL_14	αT3, δT3, γT3, ΣT3	3_146261139	0.08	88649889	88642156
αT3	Zm00001d033334	1	259330315	259335855	-		Calcium-transporting ATPase 2 plasma membrane-type	gene	protein_coding	0.00411389	103	0.465305								NAM_JL_6	αT3	1_263072999	0.26	3742684	3737144
αT3	Zm00001d006620	2	212765615	212768754	-		Protein TIC 20-IV chloroplastic	gene	protein_coding	0.00416119	104	0.469823
αT3	Zm00001d040154	3	29437444	29458737	-			gene	protein_coding	0.00419418	105	0.47434								NAM_JL_14	αT3, δT3, γT3, ΣT3	3_146261139	0.08	116823695	116802402
αT3	Zm00001d041741	3	135630419	135632423	-		Cytochrome P450 71D7	gene	protein_coding	0.00420396	106	0.478858								NAM_JL_14	αT3, δT3, γT3, ΣT3	3_146261139	0.08	10630720	10628716
αT3	Zm00001d013095	5	4680234	4684555	-		Replication factor C subunit 3	gene	protein_coding	0.00428287	107	0.483375
αT3	Zm00001d048669	4	3057594	3060877	+		Auxin-induced beta-glucosidase%253B Putative O-Glycosyl hydrolase superfamily protein	gene	protein_coding	0.00431106	108	0.487893
αT3	Zm00001d002349	2	10674198	10679341	-	kaurene synthase3	kaurene synthase3	gene	protein_coding	0.00433772	109	0.492411
αT3	Zm00001d016561	5	167601437	167601760	+		chaperone protein dnaJ-related	gene	protein_coding	0.00436124	110	0.496928
γT	Zm00001d032576	1	231120510	231123615	-	GRMZM2G036455	Protochlorophyllide reductase C chloroplastic	gene	protein_coding	1.07e-07	1	0.00451753	Yes							NAM_JL_5	αT, δT, γT, ΣT, δT3, γT3, ΣTT3	1_230879002	0.6	-241508	-244613
γT	Zm00001d013937	5	25431430	25434346	-	GRMZM2G073351	Protochlorophyllide reductase C chloroplastic	gene	protein_coding	1.19e-06	2	0.00903506	Yes	γT_3	5.87e-11	1	8.32041e-06	3519	603	NAM_JL_24	αT, δT, γT, ΣT, δT3, γT3, ΣTT3	5_25433577	0.89	2147	-769
γT	Zm00001d032566	1	230666267	230672973	-			gene	protein_coding	1.65e-06	3	0.0135526		γT_2	4.31e-08	34	0.000282894	-94563	-101269	NAM_JL_5	αT, δT, γT, ΣT, δT3, γT3, ΣTT3	1_230879002	0.6	212735	206029
γT	Zm00001d013933	5	25177803	25179923	-		CBS domain-containing protein CBSX5	gene	protein_coding	9.13e-06	4	0.0180701								NAM_JL_24	αT, δT, γT, ΣT, δT3, γT3, ΣTT3	5_25433577	0.89	255774	253654
γT	Zm00001d021244	7	146789970	146799955	-			gene	protein_coding	1.23e-05	5	0.0225876
γT	Zm00001d044017	3	216717307	216725476	-		Probable plastid-lipid-associated protein 14 chloroplastic	gene	protein_coding	1.51e-05	6	0.0271052
γT	Zm00001d016581	5	168223687	168255407	+		DNA polymerase epsilon catalytic subunit A	gene	protein_coding	4.26e-05	7	0.0316227
γT	Zm00001d026382	10	144818522	144822103	-		G-type lectin S-receptor-like serine/threonine-protein kinase B120	gene	protein_coding	8.64e-05	8	0.0361402								NAM_JL_52	δT, γT, ΣT, ΣTT3	10_145879135	0.8	1060613	1057032
γT	Zm00001d008752	8	18999372	19006082	-		Calcium-dependent lipid-binding (CaLB domain) family protein	gene	protein_coding	0.000105046	9	0.0406578
γT	Zm00001d018891	7	8478320	8494304	-	chloroplast RNA processing4	chloroplast RNA processing4	gene	protein_coding	0.000138432	10	0.0451753
γT	Zm00001d010742	8	126451432	126451995	+		Putative pentatricopeptide repeat-containing protein	gene	protein_coding	0.000156738	11	0.0496928								NAM_JL_41	αT, γT, ΣT, δT3, ΣTT3	8_142288254	0.17	15836822	15836259
γT	Zm00001d005478	2	175506166	175511789	+		Cellulose synthase A catalytic subunit 5 [UDP-forming]	gene	protein_coding	0.000219893	12	0.0542103
γT	Zm00001d002685	2	19212994	19214316	-		Thioredoxin-like 3-3	gene	protein_coding	0.000238125	13	0.0587279
γT	Zm00001d044042	3	217573164	217581039	+	malate dehydrogenase3	malate dehydrogenase3	gene	protein_coding	0.00024569	14	0.0632454
γT	Zm00001d004019	2	76032746	76036570	+	stearoyl-acyl-carrier-protein desaturase5	stearoyl-acyl-carrier-protein desaturase5	gene	protein_coding	0.000336435	15	0.0677629								NAM_JL_10	δT, γT, αT3, γT3, ΣT3
γT	Zm00001d006437	2	208168131	208169072	+		Monothiol glutaredoxin-S17	gene	protein_coding	0.000339598	16	0.0722804
γT	Zm00001d048171	9	151310394	151315075	-	chloroplast RNA splicing4	Protein CLT2 chloroplastic	gene	protein_coding	0.000406167	17	0.076798								NAM_JL_47	δT
γT	Zm00001d030129	1	107865921	107867117	-		S-adenosyl-L-methionine-dependent methyltransferases superfamily protein	gene	protein_coding	0.000460722	18	0.0813155								NAM_JL_4	δT, δT3, γT3, ΣT3, ΣTT3
γT	Zm00001d017742	5	205734245	205737675	-	GRF-transcription factor 6	Growth-regulating factor 6	gene	protein_coding	0.000465934	19	0.085833		γT_5	1.87e-08	13	0.000108165	93910	90480	NAM_JL_28	αT, γT, αT3, γT3	5_206102387	0.11	368142	364712
γT	Zm00001d005833	2	190344608	190350123	+		Protein Brevis radix-like 4	gene	protein_coding	0.00046828	20	0.0903506								NAM_JL_11	γT, ΣT, ΣTT3	2_202051918	0.35	11707310	11701795
γT	Zm00001d033981	1	279982395	279986186	-	ATP sulfurylase1	ATP sulfurylase1	gene	protein_coding	0.000482654	21	0.0948681
γT	Zm00001d017951	5	210778082	210779268	+		Nudix hydrolase 17 mitochondrial	gene	protein_coding	0.000504619	22	0.0993856								NAM_JL_29	δT, δT3, ΣTT3
γT	Zm00001d016748	5	174862785	174863648	-		Protein MKS1	gene	protein_coding	0.000522375	23	0.103903
γT	Zm00001d041977	3	146369021	146370053	-		Glutathione S-transferase T1	gene	protein_coding	0.000524523	24	0.108421								NAM_JL_14	αT3, δT3, γT3, ΣT3
γT	Zm00001d010062	8	97855255	97858701	-		Rop guanine nucleotide exchange factor 7	gene	protein_coding	0.000557583	25	0.112938
γT	Zm00001d046499	9	92565565	92566347	-		DNA binding%3BDNA-directed RNA polymerases	gene	protein_coding	0.00069474	26	0.117456								NAM_JL_45	αT, δT, γT, ΣT, αT3, δT3, γT3, ΣT3, ΣTT3	9_98840677	0.06	6275112	6274330
γT	Zm00001d049253	4	22955772	22957129	+		40S ribosomal protein S4-3	gene	protein_coding	0.000700845	27	0.121973
γT	Zm00001d024675	10	83281590	83288964	+		RNA-binding (RRM/RBD/RNP motifs) family protein	gene	protein_coding	0.000711781	28	0.126491								NAM_JL_51	αT3, ΣT3
γT	Zm00001d021445	7	152358112	152359792	-		60S ribosomal protein L14-1	gene	protein_coding	0.000822083	29	0.131008
γT	Zm00001d009648	8	74317968	74318441	-		Oleosin Bn-V	gene	protein_coding	0.000826468	30	0.135526
γT	Zm00001d047911	9	145078478	145081740	+		HVA22-like protein i	gene	protein_coding	0.000835122	31	0.140043
γT	Zm00001d037494	6	127256992	127257723	+		Sterile alpha motif (SAM) domain-containing protein	gene	protein_coding	0.000939738	32	0.144561								NAM_JL_32	αT, γT3, ΣT3, ΣTT3
γT	Zm00001d023492	10	7294593	7311266	-		RING/FYVE/PHD zinc finger superfamily protein	gene	protein_coding	0.00101028	33	0.149078								NAM_JL_48	αT3
γT	Zm00001d017387	5	194083665	194108336	-		shortage in chiasmata 1	gene	protein_coding	0.0010119	34	0.153596
γT	Zm00001d047401	9	128893506	128896643	+		Serine/arginine-rich SC35-like splicing factor SCL33	gene	protein_coding	0.00103391	35	0.158113
γT	Zm00001d053778	4	240939248	240942799	+		Cell division control protein 50	gene	protein_coding	0.00103832	36	0.162631
γT	Zm00001d007471	2	232434738	232435620	+			gene	protein_coding	0.00105304	37	0.167149
γT	Zm00001d043296	3	194966876	194977775	+		zinc knuckle (CCHC-type) family protein	gene	protein_coding	0.00109435	38	0.171666								NAM_JL_18	αT, γT, ΣT, δT3	3_197021759	0.12	2054883	2043984
γT	Zm00001d010799	8	128196797	128210614	+			gene	protein_coding	0.00109473	39	0.176184								NAM_JL_41	αT, γT, ΣT, δT3, ΣTT3	8_142288254	0.17	14091457	14077640
γT	Zm00001d040953	3	82375568	82389198	+		NAD(P)-binding Rossmann-fold superfamily protein	gene	protein_coding	0.00117432	40	0.180701								NAM_JL_14	αT3, δT3, γT3, ΣT3
γT	Zm00001d047713	9	139754473	139758419	-		Eukaryotic translation initiation factor 2 subunit alpha	gene	protein_coding	0.0011755	41	0.185219								NAM_JL_46	γT, ΣT	9_140015905	0.24	261432	257486
γT	Zm00001d047823	9	142600819	142606209	-		Retrovirus-related Pol polyprotein LINE-1	gene	protein_coding	0.00125499	42	0.189736
γT	Zm00001d019700	7	51770577	51776771	+		Protein LONGIFOLIA 2	gene	protein_coding	0.00130556	43	0.194254								NAM_JL_36	δT, αT3, δT3
γT	Zm00001d039026	6	168872299	168875758	-		F-box protein family-like protein	gene	protein_coding	0.00132395	44	0.198771								NAM_JL_34	PC8
γT	Zm00001d023838	10	23887314	23897377	-		Auxilin-related protein 1	gene	protein_coding	0.00132815	45	0.203289								NAM_JL_49	γT, ΣT, δT3, γT3, ΣTT3	10_19673358	0.48	-4213956	-4224019
γT	Zm00001d045053	9	11184015	11184376	+		60S ribosomal protein L35a-2	gene	protein_coding	0.00133802	46	0.207806
γT	Zm00001d040941	3	81369102	81382294	-		Chaperone protein dnaJ 50	gene	protein_coding	0.00146108	47	0.212324								NAM_JL_14	αT3, δT3, γT3, ΣT3
γT	Zm00001d007279	2	226688336	226698541	+		La-related protein 6B	gene	protein_coding	0.00156152	48	0.216841								NAM_JL_12	αT, δT, γT, ΣT, ΣTT3	2_216530125	0.32	-10158211	-10168416
γT	Zm00001d049624	4	37970635	37973407	-		Magnesium transporter CorA-like family protein	gene	protein_coding	0.00162185	49	0.221359								NAM_JL_21	δT, γT, ΣT, αT3, δT3, γT3, ΣT3, ΣTT3	4_30887160	0.24	-7083475	-7086247
γT	Zm00001d046060	9	60497376	60505212	-		CMP-sialic acid transporter 1	gene	protein_coding	0.00163217	50	0.225876								NAM_JL_45	αT, δT, γT, ΣT, αT3, δT3, γT3, ΣT3, ΣTT3	9_98840677	0.06	38343301	38335465
γT	Zm00001d011560	8	154457261	154486289	+	Homeobox-transcription factor 113	Homeobox-DDT domain protein RLT1	gene	protein_coding	0.00165379	51	0.230394
γT	Zm00001d002024	2	4593403	4606170	+		NADPH--cytochrome P450 reductase 2	gene	protein_coding	0.00168427	52	0.234911
γT	Zm00001d015208	5	79389803	79395312	+		Cleavage and polyadenylation specificity factor (CPSF) A subunit protein	gene	protein_coding	0.00170195	53	0.239429
γT	Zm00001d043249	3	193232903	193236532	-		NAD(P)H dehydrogenase (quinone) FQR1	gene	protein_coding	0.00176298	54	0.243947								NAM_JL_18	αT, γT, ΣT, δT3	3_197021759	0.12	3788856	3785227
γT	Zm00001d007038	2	220640379	220648182	+		Proteasome subunit alpha type	gene	protein_coding	0.00187702	55	0.248464								NAM_JL_12	αT, δT, γT, ΣT, ΣTT3	2_216530125	0.32	-4110254	-4118057
γT	Zm00001d014598	5	54724156	54726135	+		Pentatricopeptide repeat-containing protein	gene	protein_coding	0.00187891	56	0.252982								NAM_JL_25	αT3, ΣT3
γT	Zm00001d022031	7	168308173	168317920	+			gene	protein_coding	0.00191066	57	0.257499
γT	Zm00001d008724	8	17871316	17876968	-		Protein NSP-INTERACTING KINASE 3	gene	protein_coding	0.00193239	58	0.262017
γT	Zm00001d032948	1	244409830	244413837	-		3-ketoacyl-CoA synthase	gene	protein_coding	0.00197103	59	0.266534
γT	Zm00001d044549	3	231411700	231414420	+			gene	protein_coding	0.00201592	60	0.271052								NAM_JL_19	αT3
γT	Zm00001d016736	5	174721846	174726025	-		2-Cys peroxiredoxin BAS1 chloroplastic	gene	protein_coding	0.00205115	61	0.275569
γT	Zm00001d046971	9	113591821	113595110	-		Filamentation temperature-sensitive H 2A isoform 1%253B Filamentation temperature-sensitive H 2A isoform 2%253B Filamentation temperature-sensitive H 2A isoform 3	gene	protein_coding	0.00208097	62	0.280087
γT	Zm00001d014325	5	41050430	41054227	+		Calcium-binding EF-hand family protein	gene	protein_coding	0.00208254	63	0.284604
γT	Zm00001d045725	9	35215354	35239296	-		ARM repeat superfamily protein	gene	protein_coding	0.00208304	64	0.289122								NAM_JL_45	αT, δT, γT, ΣT, αT3, δT3, γT3, ΣT3, ΣTT3	9_98840677	0.06	63625323	63601381
γT	Zm00001d018912	7	9117216	9136917	+	PHD-transcription factor 19	Acyl-CoA N-acyltransferase with RING/FYVE/PHD-type zinc finger protein	gene	protein_coding	0.00209099	65	0.293639
γT	Zm00001d006701	2	214683529	214685193	+	GRAS-transcription factor 75	GRAS transcription factor [Source:UniProtKB/TrEMBL%3BAcc:C0P6K9]	gene	protein_coding	0.00209137	66	0.298157
γT	Zm00001d022211	7	172910370	172911336	+			gene	protein_coding	0.0021307	67	0.302674
γT	Zm00001d033848	1	275704805	275707378	-	bHLH-transcription factor 137	Transcription factor bHLH18	gene	protein_coding	0.00215341	68	0.307192
γT	Zm00001d011796	8	161717957	161722781	-		Putative mitochondrial processing peptidase alpha subunit family protein	gene	protein_coding	0.0021635	69	0.311709
γT	Zm00001d020339	7	107406057	107408465	+		glycosyl hydrolase family 81 protein	gene	protein_coding	0.00232363	70	0.316227
γT	Zm00001d049539	4	33796845	33798491	+		FAD-binding Berberine family protein	gene	protein_coding	0.00234576	71	0.320744								NAM_JL_21	δT, γT, ΣT, αT3, δT3, γT3, ΣT3, ΣTT3	4_30887160	0.24	-2909685	-2911331
γT	Zm00001d030944	1	168495355	168497554	-		Plastidial lipoyltransferase 2	gene	protein_coding	0.00236454	72	0.325262								NAM_JL_4	δT, δT3, γT3, ΣT3, ΣTT3
γT	Zm00001d037604	6	131348955	131353566	-		Ethylene response sensor 1	gene	protein_coding	0.00236655	73	0.32978								NAM_JL_32	αT, γT3, ΣT3, ΣTT3
γT	Zm00001d042180	3	155197945	155203597	+		VAP27-2	gene	protein_coding	0.00238243	74	0.334297
γT	Zm00001d049734	4	42094874	42102440	+		Putative 1-phosphatidylinositol-4-phosphate 5-kinase/ zinc ion binding family	gene	protein_coding	0.00239499	75	0.338815								NAM_JL_21	δT, γT, ΣT, αT3, δT3, γT3, ΣT3, ΣTT3	4_30887160	0.24	-11207714	-11215280
γT	Zm00001d000288	B73V4_ctg104	67198	68824	-	Aux/IAA-transcription factor 25	Auxin-responsive protein IAA29	gene	protein_coding	0.00243668	76	0.343332
γT	Zm00001d036205	6	77009440	77011438	-			gene	protein_coding	0.00248614	77	0.34785								NAM_JL_30	γT, ΣT, δT3, γT3, ΣT3, ΣTT3	6_89292276	0.19	12282836	12280838
γT	Zm00001d040279	3	35510649	35520277	-	topless-related1	topless-related1	gene	protein_coding	0.00248631	78	0.352367								NAM_JL_14	αT3, δT3, γT3, ΣT3
γT	Zm00001d017383	5	193951312	193955766	+	MYB-transcription factor 26	myb domain protein 19	gene	protein_coding	0.00252476	79	0.356885
γT	Zm00001d029343	1	66648726	66655094	+		Probable F-actin-capping protein subunit beta	gene	protein_coding	0.00254839	80	0.361402
γT	Zm00001d027286	1	1834232	1835383	+		Flavin-containing monooxygenase FMO GS-OX5	gene	protein_coding	0.00258287	81	0.36592
γT	Zm00001d053616	4	236545424	236550919	+		26S protease regulatory subunit 8 homolog B	gene	protein_coding	0.00266188	82	0.370437
γT	Zm00001d053528	4	233126072	233126482	-		Cwf21	gene	protein_coding	0.00270059	83	0.374955
γT	Zm00001d025963	10	134955202	134961784	+		Sphingoid long-chain bases kinase 1	gene	protein_coding	0.00270077	84	0.379472
γT	Zm00001d017656	5	203295312	203302352	+		Uncharacterized enzyme involved in pigment biosynthesis	gene	protein_coding	0.00270974	85	0.38399
γT	Zm00001d051594	4	164049037	164049507	-			gene	protein_coding	0.00273365	86	0.388507
γT	Zm00001d053273	4	223581945	223588791	+		Adhesin FhaB [Source:UniProtKB/TrEMBL%3BAcc:B4FPB1]	gene	protein_coding	0.00273603	87	0.393025
γT	Zm00001d002833	2	24243407	24244918	+		Pepsin A	gene	protein_coding	0.00275094	88	0.397542								NAM_JL_9	ΣT
γT	Zm00001d021948	7	166828550	166830651	+		Probable serine/threonine-protein kinase WNK11	gene	protein_coding	0.00275911	89	0.40206
γT	Zm00001d034076	1	283401534	283408034	+		Cyclic nucleotide-gated ion channel 2	gene	protein_coding	0.00277195	90	0.406578
γT	Zm00001d012274	8	171718376	171721067	+		hydroxycinnamoyltransferase10	gene	protein_coding	0.00279251	91	0.411095
γT	Zm00001d039097	6	169964430	169967225	-		Protein STRUBBELIG-RECEPTOR FAMILY 1	gene	protein_coding	0.00282127	92	0.415613
γT	Zm00001d007195	2	224443511	224453697	-		Alpha-L-arabinofuranosidase 1	gene	protein_coding	0.00283179	93	0.42013								NAM_JL_12	αT, δT, γT, ΣT, ΣTT3	2_216530125	0.32	-7913386	-7923572
γT	Zm00001d004463	2	113526922	113567649	+		Sterol 3-beta-glucosyltransferase UGT80A2	gene	protein_coding	0.00284653	94	0.424648								NAM_JL_10	δT, γT, αT3, γT3, ΣT3
γT	Zm00001d018358	5	219156200	219158425	+		Protein TIC 55 chloroplastic	gene	protein_coding	0.0028835	95	0.429165
γT	Zm00001d021032	7	140954748	140973549	-		RING/U-box superfamily protein	gene	protein_coding	0.00289446	96	0.433683								NAM_JL_38	αT
γT	Zm00001d017754	5	205924278	205940214	-		yeast YAK1-related gene 1	gene	protein_coding	0.00294192	97	0.4382		γT_5	1.87e-08	13	0.000108165	-96123	-112059	NAM_JL_28	αT, γT, αT3, γT3	5_206102387	0.11	178109	162173
γT	Zm00001d045729	9	35624307	35627408	+		Protein NSP-INTERACTING KINASE 1	gene	protein_coding	0.00296604	98	0.442718								NAM_JL_45	αT, δT, γT, ΣT, αT3, δT3, γT3, ΣT3, ΣTT3	9_98840677	0.06	63216370	63213269
γT	Zm00001d047807	9	142293225	142295467	-		Probable protein phosphatase 2C 4	gene	protein_coding	0.00298524	99	0.447235								NAM_JL_46	γT, ΣT	9_140015905	0.24	-2277320	-2279562
γT	Zm00001d003861	2	63431223	63436171	-		Potassium high-affinity transporter	gene	protein_coding	0.00303068	100	0.451753								NAM_JL_10	δT, γT, αT3, γT3, ΣT3
γT	Zm00001d008591	8	13719470	13722383	-		Octicosapeptide/Phox/Bem1p family protein	gene	protein_coding	0.00314271	101	0.45627
γT	Zm00001d033237	1	255361226	255391452	-		Uncharacterised conserved protein UCP031088 alpha/beta hydrolase	gene	protein_coding	0.00314539	102	0.460788
γT	Zm00001d006607	2	212378283	212389458	+		HOPM interactor 7	gene	protein_coding	0.00319498	103	0.465305
γT	Zm00001d052288	4	186086302	186089507	+	E2F-DP-transcription factor 213	E2F transcription factor-like E2FE	gene	protein_coding	0.00321728	104	0.469823
γT	Zm00001d039378	3	2791183	2793926	+			gene	protein_coding	0.00323459	105	0.47434
γT	Zm00001d002052	2	5018197	5021343	-		Probable isoaspartyl peptidase/L-asparaginase 2	gene	protein_coding	0.00331285	106	0.478858
γT	Zm00001d041365	3	114433709	114437553	-		Bifunctional nuclease 1	gene	protein_coding	0.0033323	107	0.483375								NAM_JL_14	αT3, δT3, γT3, ΣT3
γT	Zm00001d005195	2	163095556	163101315	+		RING/U-box superfamily protein	gene	protein_coding	0.00337236	108	0.487893
γT	Zm00001d013996	5	27841955	27848005	-		Syntaxin-41	gene	protein_coding	0.00342929	109	0.492411								NAM_JL_24	αT, δT, γT, ΣT, δT3, γT3, ΣTT3	5_25433577	0.89	-2408378	-2414428
γT	Zm00001d002819	2	23558116	23563958	+	autophagy13c	Autophagy-related protein 13a	gene	protein_coding	0.00344514	110	0.496928								NAM_JL_9	ΣT
γT3	Zm00001d046558	9	95895575	95899061	+	homogentisate geranylgeranyl transferase1	homogentisate geranylgeranyl transferase1	gene	protein_coding	3.78e-11	1	0.00451753	Yes	γT3_6	1.47e-19	1	8.32041e-06	68343	64857	NAM_JL_45	αT, δT, γT, ΣT, αT3, δT3, γT3, ΣT3, ΣTT3	9_95962596	0.98	67021	63535
γT3	Zm00001d041920	3	143644925	143649063	-	bZIP-transcription factor 8	Transcription factor PosF21	gene	protein_coding	9.67e-06	2	0.00903506								NAM_JL_14	αT3, δT3, γT3, ΣT3	3_122899586	0.08	-20745339	-20749477
γT3	Zm00001d005874	2	191436169	191438639	-			gene	protein_coding	1.03e-05	3	0.0135526								NAM_JL_11	γT, ΣT, ΣTT3
γT3	Zm00001d032788	1	238190770	238192464	-		GDSL esterase/lipase LTL1	gene	protein_coding	6.42e-05	4	0.0180701								NAM_JL_5	αT, δT, γT, ΣT, δT3, γT3, ΣTT3	1_232249529	0.29	-5941241	-5942935
γT3	Zm00001d016907	5	179669837	179673125	+	E2F-DP-transcription factor 28	Purple acid phosphatase 3	gene	protein_coding	6.45e-05	5	0.0225876
γT3	Zm00001d014258	5	38466701	38476589	-	alanine aminotransferase5	alanine aminotransferase5	gene	protein_coding	6.94e-05	6	0.0271052
γT3	Zm00001d045063	9	11346646	11348519	+		Cytochrome P450 709B2	gene	protein_coding	7.06e-05	7	0.0316227
γT3	Zm00001d003709	2	55723782	55724426	+		Cell wall / vacuolar inhibitor of fructosidase 2	gene	protein_coding	7.17e-05	8	0.0361402								NAM_JL_10	δT, γT, αT3, γT3, ΣT3	2_45757168	0.11	-9966614	-9967258
γT3	Zm00001d030379	1	127537249	127540620	-		Deoxyribodipyrimidine photo-lyase	gene	protein_coding	0.000141555	9	0.0406578								NAM_JL_4	δT, δT3, γT3, ΣT3, ΣTT3	1_82565810	0.22	-44971439	-44974810
γT3	Zm00001d017986	5	211406416	211411375	-	E2F-DP-transcription factor 27	E2F transcription factor-like E2FE	gene	protein_coding	0.000154977	10	0.0451753
γT3	Zm00001d031737	1	200260170	200262141	-		NC domain-containing protein-related	gene	protein_coding	0.00016812	11	0.0496928
γT3	Zm00001d040155	3	29580356	29584912	+		Protein EXECUTER 2 chloroplastic	gene	protein_coding	0.000200567	12	0.0542103								NAM_JL_14	αT3, δT3, γT3, ΣT3	3_122899586	0.08	93319230	93314674
γT3	Zm00001d046613	9	98839260	98845509	+		Elongator complex protein 4	gene	protein_coding	0.000206322	13	0.0587279								NAM_JL_45	αT, δT, γT, ΣT, αT3, δT3, γT3, ΣT3, ΣTT3	9_95962596	0.98	-2876664	-2882913
γT3	Zm00001d009010	8	30106964	30108529	-		Plasma membrane-associated cation-binding protein 1	gene	protein_coding	0.0002275	14	0.0632454
γT3	Zm00001d046555	9	95832622	95834867	-	embryo specific18	embryo specific18	gene	protein_coding	0.000232487	15	0.0677629								NAM_JL_45	αT, δT, γT, ΣT, αT3, δT3, γT3, ΣT3, ΣTT3	9_95962596	0.98	129974	127729
γT3	Zm00001d006096	2	198090417	198092894	+			gene	protein_coding	0.000236391	16	0.0722804								NAM_JL_11	γT, ΣT, ΣTT3
γT3	Zm00001d010282	8	107273501	107276222	-		Single-stranded nucleic acid binding R3H protein	gene	protein_coding	0.000266063	17	0.076798
γT3	Zm00001d009510	8	68255301	68258169	-		Eukaryotic aspartyl protease family protein	gene	protein_coding	0.000288305	18	0.0813155
γT3	Zm00001d009848	8	84947841	84951081	+		60S ribosomal protein L18-3	gene	protein_coding	0.000293756	19	0.085833
γT3	Zm00001d046299	9	79124493	79126324	+	HSF-transcription factor 28	HSF28 HSF type transcription factor	gene	protein_coding	0.000305587	20	0.0903506								NAM_JL_45	αT, δT, γT, ΣT, αT3, δT3, γT3, ΣT3, ΣTT3	9_95962596	0.98	16838103	16836272
γT3	Zm00001d051219	4	148978271	148980970	-		RNI-like superfamily protein	gene	protein_coding	0.000310699	21	0.0948681								NAM_JL_21	δT, γT, ΣT, αT3, δT3, γT3, ΣT3, ΣTT3	4_38783673	0.11	-110194598	-110197297
γT3	Zm00001d034160	1	285335178	285337132	+	G2-like-transcription factor 44	DNA binding protein	gene	protein_coding	0.000313129	22	0.0993856								NAM_JL_7	αT3
γT3	Zm00001d017551	5	199349177	199350492	+		DUF241 domain protein	gene	protein_coding	0.000313807	23	0.103903								NAM_JL_27	δT
γT3	Zm00001d044632	3	233648719	233649722	+		DTW domain-containing protein	gene	protein_coding	0.000339001	24	0.108421								NAM_JL_19	αT3
γT3	Zm00001d017746	5	205825586	205829216	+	vitamin E synthesis4	vitamin E synthesis4	gene	protein_coding	0.000350115	25	0.112938	Yes	γT3_4	3.02e-11	59	0.000490904	28284	24654	NAM_JL_28	αT, γT, αT3, γT3	5_205824621	0.55	-965	-4595
γT3	Zm00001d005666	2	182755798	182758430	+		Pumilio homolog 12	gene	protein_coding	0.00037327	26	0.117456
γT3	Zm00001d045631	9	29285315	29290140	+		Acyl-CoA N-acyltransferase with RING/FYVE/PHD-type zinc finger domain	gene	protein_coding	0.00037844	27	0.121973								NAM_JL_45	αT, δT, γT, ΣT, αT3, δT3, γT3, ΣT3, ΣTT3	9_95962596	0.98	66677281	66672456
γT3	Zm00001d039108	6	170139690	170140607	-		Plant-specific domain TIGR01570 family protein	gene	protein_coding	0.000411646	28	0.126491
γT3	Zm00001d012652	8	177983385	177988780	+		Signal recognition particle 54 kDa protein 3	gene	protein_coding	0.000416482	29	0.131008								NAM_JL_43	αT3, δT3, γT3	8_178936093	0.19	952708	947313
γT3	Zm00001d025005	10	99217386	99219471	-	Yucca2	Yucca2	gene	protein_coding	0.000420617	30	0.135526								NAM_JL_51	αT3, ΣT3
γT3	Zm00001d030790	1	159877875	159884491	+		Probable galacturonosyltransferase 13	gene	protein_coding	0.000431007	31	0.140043								NAM_JL_4	δT, δT3, γT3, ΣT3, ΣTT3	1_82565810	0.22	-77312065	-77318681
γT3	Zm00001d022454	7	178054205	178059227	+		F-box family protein	gene	protein_coding	0.00044625	32	0.144561								NAM_JL_39	αT3
γT3	Zm00001d022475	7	178358854	178366543	-			gene	protein_coding	0.000472145	33	0.149078
γT3	Zm00001d019934	7	77376492	77379346	-		O-Glycosyl hydrolases family 17 protein	gene	protein_coding	0.00047555	34	0.153596								NAM_JL_36	δT, αT3, δT3
γT3	Zm00001d045113	9	13149723	13154901	-		Calcineurin-like metallo-phosphoesterase superfamily protein	gene	protein_coding	0.000496132	35	0.158113
γT3	Zm00001d032948	1	244409830	244413837	-		3-ketoacyl-CoA synthase	gene	protein_coding	0.000499097	36	0.162631
γT3	Zm00001d033400	1	261836342	261838185	+		Metal-dependent protein hydrolase	gene	protein_coding	0.00051686	37	0.167149								NAM_JL_6	αT3
γT3	Zm00001d008940	8	26144396	26151066	-		ABC transporter D family member 2 chloroplastic	gene	protein_coding	0.000519486	38	0.171666
γT3	Zm00001d010459	8	116264102	116265454	+		Putative CBL-interacting protein kinase family protein	gene	protein_coding	0.00052122	39	0.176184
γT3	Zm00001d008600	8	14146760	14152703	+		Sulfoquinovosyl transferase SQD2	gene	protein_coding	0.00053807	40	0.180701
γT3	Zm00001d039456	3	4838566	4841548	-		RAP	gene	protein_coding	0.000584655	41	0.185219
γT3	Zm00001d038170	6	150418144	150422431	-	deoxy xylulose synthase 1	deoxy xylulose synthase 1	gene	protein_coding	0.000600022	42	0.189736	Yes							NAM_JL_32	αT, γT3, ΣT3, ΣTT3	6_137234579	0.64	-13183565	-13187852
γT3	Zm00001d020639	7	125925841	125929813	-		Probable GTP diphosphokinase RSH2 chloroplastic	gene	protein_coding	0.000608574	43	0.194254
γT3	Zm00001d043045	3	187256637	187257673	-			gene	protein_coding	0.000611506	44	0.198771								NAM_JL_18	αT, γT, ΣT, δT3
γT3	Zm00001d019060	7	14494700	14497925	+	deoxy xylulose synthase 2	deoxy xylulose synthase 2	gene	protein_coding	0.000622509	45	0.203289	Yes							NAM_JL_35	δT3, γT3, ΣT3, ΣTT3	7_14409183	0.96	-85517	-88742
γT3	Zm00001d027295	1	2104761	2106624	+	beta tubulin1	beta tubulin1	gene	protein_coding	0.000694578	46	0.207806
γT3	Zm00001d046535	9	94503734	94505652	+		Phosphatidylcholine:diacylglycerol cholinephosphotransferase 1	gene	protein_coding	0.000705352	47	0.212324								NAM_JL_45	αT, δT, γT, ΣT, αT3, δT3, γT3, ΣT3, ΣTT3	9_95962596	0.98	1458862	1456944
γT3	Zm00001d025694	10	126527371	126529992	+		Surfeit locus protein 2 (SURF2)	gene	protein_coding	0.000706253	48	0.216841
γT3	Zm00001d020348	7	108322505	108323760	+			gene	protein_coding	0.000710097	49	0.221359
γT3	Zm00001d014449	5	47751804	47756916	-		Chromo domain-containing protein LHP1	gene	protein_coding	0.000725999	50	0.225876								NAM_JL_25	αT3, ΣT3
γT3	Zm00001d013228	5	6770365	6773482	+		TIP41-like family protein	gene	protein_coding	0.000732531	51	0.230394
γT3	Zm00001d025946	10	134457486	134477101	+		Serine/threonine-protein kinase GRIK1	gene	protein_coding	0.000752992	52	0.234911
γT3	Zm00001d008407	8	7956555	7961097	+		Protein RER1B	gene	protein_coding	0.000787754	53	0.239429
γT3	Zm00001d009740	8	78864307	78867209	+		Plasminogen activator inhibitor 1 RNA-binding protein	gene	protein_coding	0.000796063	54	0.243947
γT3	Zm00001d034371	1	291096651	291105612	+		Nuclear pore complex protein NUP1	gene	protein_coding	0.000825979	55	0.248464
γT3	Zm00001d015293	5	82992330	82999777	-		VIN3-like protein 2	gene	protein_coding	0.000866424	56	0.252982
γT3	Zm00001d008225	8	1785019	1794777	-	bZIP-transcription factor 72	Transcription factor TGA6	gene	protein_coding	0.000880235	57	0.257499
γT3	Zm00001d025081	10	102855786	102857533	-		Rhodanese-like domain-containing protein 19 mitochondrial	gene	protein_coding	0.000889706	58	0.262017								NAM_JL_51	αT3, ΣT3
γT3	Zm00001d052946	4	205821051	205824128	-		OSJNBb0045P24.5 protein	gene	protein_coding	0.000893006	59	0.266534
γT3	Zm00001d014656	5	57723133	57728010	-	ZIM-transcription factor 36	GATA transcription factor 24	gene	protein_coding	0.000923023	60	0.271052								NAM_JL_25	αT3, ΣT3
γT3	Zm00001d049294	4	24896748	24900567	+	bHLH-transcription factor 130	Putative HLH DNA-binding domain superfamily protein	gene	protein_coding	0.000934459	61	0.275569
γT3	Zm00001d044940	9	7823935	7834292	-	bZIP-transcription factor 100	Putative bZIP transcription factor superfamily protein	gene	protein_coding	0.000965866	62	0.280087
γT3	Zm00001d008393	8	7165508	7169469	+		Putative aldehyde dehydrogenase family protein	gene	protein_coding	0.00097846	63	0.284604
γT3	Zm00001d009652	8	74457985	74460428	+	acidic ribosomal protein P2a-2	acidic ribosomal protein P2a-2	gene	protein_coding	0.00100621	64	0.289122
γT3	Zm00001d003200	2	35415696	35425758	-		S-adenosyl-L-methionine-dependent methyltransferases superfamily protein	gene	protein_coding	0.00101734	65	0.293639								NAM_JL_10	δT, γT, αT3, γT3, ΣT3	2_45757168	0.11	10341472	10331410
γT3	Zm00001d033158	1	252436182	252443465	+	JUMONJI-transcription factor 22	Transcription factor jumonji (jmjC) domain-containing protein	gene	protein_coding	0.0010274	66	0.298157
γT3	Zm00001d035031	6	2448389	2453527	-		loricrin-related	gene	protein_coding	0.00103881	67	0.302674
γT3	Zm00001d045537	9	25841071	25846296	-		CYCLOPS	gene	protein_coding	0.00106225	68	0.307192
γT3	Zm00001d028010	1	20263677	20268913	-		conserved oligomeric Golgi complex component-related / COG complex component-related	gene	protein_coding	0.00107904	69	0.311709								NAM_JL_2	γT, δT3
γT3	Zm00001d017871	5	209242050	209250119	+		Protein S-acyltransferase 18	gene	protein_coding	0.00113657	70	0.316227								NAM_JL_29	δT, δT3, ΣTT3
γT3	Zm00001d014729	5	60860141	60862747	+		RER1A protein	gene	protein_coding	0.00114451	71	0.320744								NAM_JL_25	αT3, ΣT3
γT3	Zm00001d007082	2	221854961	221859498	-		Phosphatidylinositol 4-phosphate 5-kinase 6	gene	protein_coding	0.00115149	72	0.325262								NAM_JL_12	αT, δT, γT, ΣT, ΣTT3
γT3	Zm00001d019279	7	25301424	25304588	+	cytidine deaminase1	Cytidine/deoxycytidylate deaminase family protein%253B Putative cytidine deaminase	gene	protein_coding	0.00117082	73	0.32978								NAM_JL_36	δT, αT3, δT3
γT3	Zm00001d024675	10	83281590	83288964	+		RNA-binding (RRM/RBD/RNP motifs) family protein	gene	protein_coding	0.00118668	74	0.334297								NAM_JL_51	αT3, ΣT3
γT3	Zm00001d021843	7	164343316	164343884	+		Low-molecular-weight cysteine-rich protein LCR70 [Source:UniProtKB/TrEMBL%3BAcc:B6SMX5]	gene	protein_coding	0.00120038	75	0.338815
γT3	Zm00001d015327	5	84630842	84634232	-	ubiquitin1	ubiquitin1	gene	protein_coding	0.00121077	76	0.343332								NAM_JL_26	δT, γT, ΣT, δT3, γT3, ΣT3, ΣTT3	5_86090066	0.7	1459224	1455834
γT3	Zm00001d005684	2	183288690	183291321	+			gene	protein_coding	0.00122068	77	0.34785
γT3	Zm00001d020977	7	138407898	138409603	+			gene	protein_coding	0.00122747	78	0.352367
γT3	Zm00001d034663	1	299194181	299196764	-	alpha-expansin4	alpha-expansin4	gene	protein_coding	0.00123054	79	0.356885
γT3	Zm00001d015259	5	81752266	81766811	+		26S proteasome non-ATPase regulatory subunit 2 homolog A	gene	protein_coding	0.00125468	80	0.361402
γT3	Zm00001d013196	5	6191202	6194942	-			gene	protein_coding	0.00126023	81	0.36592
γT3	Zm00001d021557	7	155895169	155897978	-		Casein kinase II subunit beta-1	gene	protein_coding	0.00126438	82	0.370437
γT3	Zm00001d046489	9	92154833	92157937	-			gene	protein_coding	0.00127882	83	0.374955								NAM_JL_45	αT, δT, γT, ΣT, αT3, δT3, γT3, ΣT3, ΣTT3	9_95962596	0.98	3807763	3804659
γT3	Zm00001d014617	5	55870950	55872441	-		Xyloglucan endotransglucosylase/hydrolase protein 14	gene	protein_coding	0.00129635	84	0.379472								NAM_JL_25	αT3, ΣT3
γT3	Zm00001d017756	5	206004272	206007539	-		Syntaxin-22	gene	protein_coding	0.00130462	85	0.38399								NAM_JL_28	αT, γT, αT3, γT3	5_205824621	0.55	-179651	-182918
γT3	Zm00001d046226	9	73244262	73250675	-	multidrug resistance protein associated1	multidrug resistance protein associated1	gene	protein_coding	0.00131021	86	0.388507								NAM_JL_45	αT, δT, γT, ΣT, αT3, δT3, γT3, ΣT3, ΣTT3	9_95962596	0.98	22718334	22711921
γT3	Zm00001d023439	10	5628583	5632451	+		Ribonuclease H2 subunit A	gene	protein_coding	0.00131685	87	0.393025
γT3	Zm00001d007031	2	220439682	220441965	+		Chaperonin	gene	protein_coding	0.00132304	88	0.397542								NAM_JL_12	αT, δT, γT, ΣT, ΣTT3
γT3	Zm00001d036565	6	92667282	92669971	-		40S ribosomal protein S14-3	gene	protein_coding	0.00135082	89	0.40206
γT3	Zm00001d042765	3	179131107	179131481	+			gene	protein_coding	0.0013756	90	0.406578
γT3	Zm00001d034410	1	292172345	292176235	+		Type IV inositol polyphosphate 5-phosphatase 7	gene	protein_coding	0.00137825	91	0.411095
γT3	Zm00001d045500	9	24646435	24651266	-		ribosomal protein L29 family protein	gene	protein_coding	0.0013831	92	0.415613
γT3	Zm00001d052405	4	189190071	189194808	-	WRI1 transcription factor2	WRI1 transcription factor2	gene	protein_coding	0.00138385	93	0.42013
γT3	Zm00001d013598	5	15104859	15105955	-		Lipid binding protein [Source:UniProtKB/TrEMBL%3BAcc:B4G0Q2]	gene	protein_coding	0.00138461	94	0.424648
γT3	Zm00001d017717	5	205082975	205085670	+		ADP-ribosylation factor B1B	gene	protein_coding	0.001449	95	0.429165								NAM_JL_28	αT, γT, αT3, γT3	5_205824621	0.55	741646	738951
γT3	Zm00001d046490	9	92160670	92162718	-		NADP-dependent oxidoreductase P2%253B Putative alcohol dehydrogenase superfamily protein	gene	protein_coding	0.00145568	96	0.433683								NAM_JL_45	αT, δT, γT, ΣT, αT3, δT3, γT3, ΣT3, ΣTT3	9_95962596	0.98	3801926	3799878
γT3	Zm00001d014950	5	69573089	69578098	+		Peptidase C78 ubiquitin fold modifier-specific peptidase 1/ 2	gene	protein_coding	0.00147642	97	0.4382								NAM_JL_25	αT3, ΣT3
γT3	Zm00001d050753	4	120953532	120958594	-	DDT-transcription factor 2	DDT domain-containing protein	gene	protein_coding	0.00149117	98	0.442718								NAM_JL_21	δT, γT, ΣT, αT3, δT3, γT3, ΣT3, ΣTT3	4_38783673	0.11	-82169859	-82174921
γT3	Zm00001d029083	1	57394910	57397707	+		alanine--glyoxylate aminotransferase1	gene	protein_coding	0.00150383	99	0.447235
γT3	Zm00001d023376	10	4272268	4274843	-	aluminum-induced protein homolog1	aluminum-induced protein homolog1	gene	protein_coding	0.00151642	100	0.451753
γT3	Zm00001d031934	1	207282233	207283474	-		Chlorophyllase-1	gene	protein_coding	0.0015525	101	0.45627	Yes
γT3	Zm00001d019243	7	23656326	23659042	-			gene	protein_coding	0.0015726	102	0.460788								NAM_JL_36	δT, αT3, δT3
γT3	Zm00001d053860	4	242400871	242404592	-		MEI2 C-terminal RRM only like 1	gene	protein_coding	0.00160253	103	0.465305
γT3	Zm00001d025754	10	128451529	128454075	+			gene	protein_coding	0.00160277	104	0.469823
γT3	Zm00001d014035	5	29983511	29986762	+		Pentatricopeptide repeat-containing protein mitochondrial	gene	protein_coding	0.00165769	105	0.47434								NAM_JL_24	αT, δT, γT, ΣT, δT3, γT3, ΣTT3	5_20667608	0.11	-9315903	-9319154
γT3	Zm00001d032223	1	217837369	217838681	-		Gibberellin 20 oxidase 2	gene	protein_coding	0.00170342	106	0.478858
γT3	Zm00001d017113	5	185778368	185786205	+			gene	protein_coding	0.00173321	107	0.483375
γT3	Zm00001d044216	3	222090042	222095901	+	bHLH-transcription factor 166	Transcription factor bHLH121	gene	protein_coding	0.00174323	108	0.487893
γT3	Zm00001d014043	5	30420457	30425053	-		PPPDE peptidase domain-containing protein 2	gene	protein_coding	0.00175098	109	0.492411								NAM_JL_24	αT, δT, γT, ΣT, δT3, γT3, ΣTT3	5_20667608	0.11	-9752849	-9757445
γT3	Zm00001d038165	6	150159091	150161690	+		Putative GID1-like gibberellin receptor	gene	protein_coding	0.0017515	110	0.496928								NAM_JL_32	αT, γT3, ΣT3, ΣTT3	6_137234579	0.64	-12924512	-12927111
δT	Zm00001d017935	5	210378851	210382756	+		zinc ion binding	gene	protein_coding	5.57e-09	1	0.00451753		δT_5	6.15e-07	1438	0.0119647	11374	7469	NAM_JL_29	δT, δT3, ΣTT3	5_210187211	0.27	-191640	-195545
δT	Zm00001d017937	5	210385310	210401948	-		S-adenosylmethionine carrier 1 chloroplastic/mitochondrial	gene	protein_coding	2.34e-05	2	0.00903506	Yes	δT_5	6.15e-07	1438	0.0119647	4915	-11723	NAM_JL_29	δT, δT3, ΣTT3	5_210187211	0.27	-198099	-214737
δT	Zm00001d032576	1	231120510	231123615	-	GRMZM2G036455	Protochlorophyllide reductase C chloroplastic	gene	protein_coding	2.4e-05	3	0.0135526	Yes							NAM_JL_5	αT, δT, γT, ΣT, δT3, γT3, ΣTT3	1_230913509	0.73	-207001	-210106
δT	Zm00001d018257	5	217516473	217524451	+			gene	protein_coding	3.06e-05	4	0.0180701
δT	Zm00001d016581	5	168223687	168255407	+		DNA polymerase epsilon catalytic subunit A	gene	protein_coding	3.46e-05	5	0.0225876
δT	Zm00001d013937	5	25431430	25434346	-	GRMZM2G073351	Protochlorophyllide reductase C chloroplastic	gene	protein_coding	3.67e-05	6	0.0271052	Yes	δT_2	1.01e-07	1238	0.0103007	5199	2283	NAM_JL_24	αT, δT, γT, ΣT, δT3, γT3, ΣTT3	5_25433577	0.54	2147	-769
δT	Zm00001d053616	4	236545424	236550919	+		26S protease regulatory subunit 8 homolog B	gene	protein_coding	4.16e-05	7	0.0316227
δT	Zm00001d015984	5	136647323	136655750	+		Transcription factor bHLH133	gene	protein_coding	4.76e-05	8	0.0361402								NAM_JL_26	δT, γT, ΣT, δT3, γT3, ΣT3, ΣTT3	5_146752702	0.7	10105379	10096952
δT	Zm00001d008724	8	17871316	17876968	-		Protein NSP-INTERACTING KINASE 3	gene	protein_coding	6.81e-05	9	0.0406578
δT	Zm00001d044017	3	216717307	216725476	-		Probable plastid-lipid-associated protein 14 chloroplastic	gene	protein_coding	9.16e-05	10	0.0451753
δT	Zm00001d041977	3	146369021	146370053	-		Glutathione S-transferase T1	gene	protein_coding	0.000124087	11	0.0496928								NAM_JL_14	αT3, δT3, γT3, ΣT3
δT	Zm00001d047911	9	145078478	145081740	+		HVA22-like protein i	gene	protein_coding	0.000130136	12	0.0542103
δT	Zm00001d005195	2	163095556	163101315	+		RING/U-box superfamily protein	gene	protein_coding	0.000147263	13	0.0587279
δT	Zm00001d021000	7	139890422	139921005	-		ATPase 4 plasma membrane-type	gene	protein_coding	0.000158348	14	0.0632454
δT	Zm00001d041365	3	114433709	114437553	-		Bifunctional nuclease 1	gene	protein_coding	0.000199501	15	0.0677629								NAM_JL_14	αT3, δT3, γT3, ΣT3
δT	Zm00001d026004	10	135832420	135834891	+		Putative WAK-related receptor-like protein kinase family protein	gene	protein_coding	0.000212651	16	0.0722804
δT	Zm00001d053728	4	239931355	239934020	-		Nucleolin	gene	protein_coding	0.000233455	17	0.076798
δT	Zm00001d013933	5	25177803	25179923	-		CBS domain-containing protein CBSX5	gene	protein_coding	0.00029166	18	0.0813155								NAM_JL_24	αT, δT, γT, ΣT, δT3, γT3, ΣTT3	5_25433577	0.54	255774	253654
δT	Zm00001d036506	6	90878266	90879517	+		Lipid binding protein	gene	protein_coding	0.000307892	19	0.085833								NAM_JL_30	γT, ΣT, δT3, γT3, ΣT3, ΣTT3
δT	Zm00001d052735	4	199333912	199344027	+		Plant UBX domain-containing protein 8	gene	protein_coding	0.000314667	20	0.0903506
δT	Zm00001d026382	10	144818522	144822103	-		G-type lectin S-receptor-like serine/threonine-protein kinase B120	gene	protein_coding	0.000317364	21	0.0948681								NAM_JL_52	δT, γT, ΣT, ΣTT3	10_145558086	0.3	739564	735983
δT	Zm00001d002024	2	4593403	4606170	+		NADPH--cytochrome P450 reductase 2	gene	protein_coding	0.000385539	22	0.0993856
δT	Zm00001d044034	3	217295175	217295784	-		DUF538 family protein	gene	protein_coding	0.000427141	23	0.103903
δT	Zm00001d038368	6	155638267	155640737	-		Peptidyl-prolyl cis-trans isomerase	gene	protein_coding	0.000443052	24	0.108421
δT	Zm00001d021244	7	146789970	146799955	-			gene	protein_coding	0.000449091	25	0.112938
δT	Zm00001d006437	2	208168131	208169072	+		Monothiol glutaredoxin-S17	gene	protein_coding	0.000457344	26	0.117456
δT	Zm00001d038198	6	151367012	151371942	-		Protease Do-like 10 mitochondrial	gene	protein_coding	0.000457668	27	0.121973
δT	Zm00001d008752	8	18999372	19006082	-		Calcium-dependent lipid-binding (CaLB domain) family protein	gene	protein_coding	0.000537968	28	0.126491
δT	Zm00001d040941	3	81369102	81382294	-		Chaperone protein dnaJ 50	gene	protein_coding	0.000557233	29	0.131008								NAM_JL_14	αT3, δT3, γT3, ΣT3
δT	Zm00001d018358	5	219156200	219158425	+		Protein TIC 55 chloroplastic	gene	protein_coding	0.000566904	30	0.135526
δT	Zm00001d017029	5	183175701	183181113	+		phosphoinositide binding	gene	protein_coding	0.000570987	31	0.140043
δT	Zm00001d014598	5	54724156	54726135	+		Pentatricopeptide repeat-containing protein	gene	protein_coding	0.000592231	32	0.144561								NAM_JL_25	αT3, ΣT3
δT	Zm00001d008599	8	14053223	14055531	-		proline-rich family protein	gene	protein_coding	0.000612901	33	0.149078
δT	Zm00001d030618	1	148822878	148823223	-		Cytochrome c oxidase subunit 5C	gene	protein_coding	0.000667961	34	0.153596								NAM_JL_4	δT, δT3, γT3, ΣT3, ΣTT3	1_175971729	0.92	27148851	27148506
δT	Zm00001d017742	5	205734245	205737675	-	GRF-transcription factor 6	Growth-regulating factor 6	gene	protein_coding	0.000765027	35	0.158113		δT_4	0.000594698	2260	0.0188041	8225	4795	NAM_JL_28	αT, γT, αT3, γT3
δT	Zm00001d011789	8	161623974	161624864	-			gene	protein_coding	0.000771793	36	0.162631
δT	Zm00001d042755	3	178989961	179001319	+			gene	protein_coding	0.000785014	37	0.167149
δT	Zm00001d044731	9	650593	652094	+			gene	protein_coding	0.000827359	38	0.171666
δT	Zm00001d000293	B73V4_ctg40	27712	33243	-		Zinc finger protein 346	gene	protein_coding	0.000832912	39	0.176184
δT	Zm00001d037006	6	108817945	108828900	-		Succinate--CoA ligase [ADP-forming] subunit beta mitochondrial	gene	protein_coding	0.000841965	40	0.180701								NAM_JL_31	δT, γT, ΣT, αT3, δT3, ΣTT3	6_113736905	0.48	4918960	4908005
δT	Zm00001d021704	7	160762148	160767245	-		Ribosomal L28 family	gene	protein_coding	0.000898899	41	0.185219
δT	Zm00001d046971	9	113591821	113595110	-		Filamentation temperature-sensitive H 2A isoform 1%253B Filamentation temperature-sensitive H 2A isoform 2%253B Filamentation temperature-sensitive H 2A isoform 3	gene	protein_coding	0.000943911	42	0.189736
δT	Zm00001d049592	4	36550723	36560221	+			gene	protein_coding	0.000977232	43	0.194254								NAM_JL_21	δT, γT, ΣT, αT3, δT3, γT3, ΣT3, ΣTT3	4_28551570	0.24	-7999153	-8008651
δT	Zm00001d047779	9	141540110	141541136	-		Whole genome shotgun sequence of line PN40024 scaffold_36.assembly12x (Fragment)	gene	protein_coding	0.000987914	44	0.198771								NAM_JL_46	γT, ΣT
δT	Zm00001d024497	10	74153903	74159100	-		ABC transporter G family member 14	gene	protein_coding	0.0010103	45	0.203289								NAM_JL_49	γT, ΣT, δT3, γT3, ΣTT3
δT	Zm00001d033472	1	263622481	263627725	-	TATA-binding protein1	TATA-binding protein1	gene	protein_coding	0.00102399	46	0.207806								NAM_JL_6	αT3
δT	Zm00001d009374	8	60778336	60784086	+		DNA replication licensing factor MCM4	gene	protein_coding	0.00103087	47	0.212324
δT	Zm00001d042482	3	169071573	169074850	-	bHLH-transcription factor 132	bHLH-transcription factor 132	gene	protein_coding	0.00104531	48	0.216841								NAM_JL_15	αT
δT	Zm00001d010988	8	136011962	136013101	+			gene	protein_coding	0.00108867	49	0.221359								NAM_JL_41	αT, γT, ΣT, δT3, ΣTT3
δT	Zm00001d032566	1	230666267	230672973	-			gene	protein_coding	0.00112904	50	0.225876								NAM_JL_5	αT, δT, γT, ΣT, δT3, γT3, ΣTT3	1_230913509	0.73	247242	240536
δT	ZeamMp151	Mt	394346	394831	-		orf161	gene	protein_coding	0.00113539	51	0.230394
δT	Zm00001d008548	8	12671727	12672398	-	wound induced protein1	Bowman-Birk type wound-induced proteinase inhibitor WIP1	gene	protein_coding	0.00121906	52	0.234911
δT	Zm00001d020930	7	136911485	136911832	-		complex I subunit	gene	protein_coding	0.00122252	53	0.239429
δT	Zm00001d030222	1	114052702	114073743	-			gene	protein_coding	0.0012342	54	0.243947								NAM_JL_4	δT, δT3, γT3, ΣT3, ΣTT3	1_175971729	0.92	61919027	61897986
δT	Zm00001d043232	3	192594531	192596281	-		Early nodulin-like protein 3	gene	protein_coding	0.00131968	55	0.248464								NAM_JL_18	αT, γT, ΣT, δT3
δT	Zm00001d019515	7	39145274	39160974	-		PTI1-like tyrosine-protein kinase 3	gene	protein_coding	0.0014467	56	0.252982								NAM_JL_36	δT, αT3, δT3	7_57173072	0.37	18027798	18012098
δT	Zm00001d006701	2	214683529	214685193	+	GRAS-transcription factor 75	GRAS transcription factor [Source:UniProtKB/TrEMBL%3BAcc:C0P6K9]	gene	protein_coding	0.00147899	57	0.257499
δT	Zm00001d012274	8	171718376	171721067	+		hydroxycinnamoyltransferase10	gene	protein_coding	0.00148786	58	0.262017
δT	Zm00001d022211	7	172910370	172911336	+			gene	protein_coding	0.00151694	59	0.266534
δT	Zm00001d009222	8	44260856	44269441	-		Pyrophosphate-energized vacuolar membrane proton pump 1	gene	protein_coding	0.0015367	60	0.271052
δT	Zm00001d037884	6	141021350	141024377	-		40S ribosomal protein S21-2	gene	protein_coding	0.00154998	61	0.275569								NAM_JL_32	αT, γT3, ΣT3, ΣTT3
δT	Zm00001d004019	2	76032746	76036570	+	stearoyl-acyl-carrier-protein desaturase5	stearoyl-acyl-carrier-protein desaturase5	gene	protein_coding	0.00155302	62	0.280087								NAM_JL_10	δT, γT, αT3, γT3, ΣT3	2_40566359	0.06	-35466387	-35470211
δT	Zm00001d033874	1	277052957	277060142	-		Thioredoxin superfamily protein	gene	protein_coding	0.00162855	63	0.284604
δT	Zm00001d016755	5	175021336	175022553	+			gene	protein_coding	0.00165895	64	0.289122
δT	Zm00001d003024	2	29734149	29735130	+		Enzyme of the cupin superfamily	gene	protein_coding	0.00175439	65	0.293639
δT	Zm00001d024199	10	55246275	55249896	+		Probable receptor-like serine/threonine-protein kinase	gene	protein_coding	0.00175884	66	0.298157								NAM_JL_49	γT, ΣT, δT3, γT3, ΣTT3
δT	Zm00001d034839	1	303573712	303576362	-		Purple acid phosphatase 15	gene	protein_coding	0.00175908	67	0.302674
δT	Zm00001d007407	2	231036635	231047416	-	related to retinoblastoma1	Retinoblastoma-related protein 1	gene	protein_coding	0.00178675	68	0.307192
δT	Zm00001d053731	4	240024809	240026803	+		Protein transport protein Sec61 subunit gamma-3	gene	protein_coding	0.0018366	69	0.311709
δT	Zm00001d014443	5	47269877	47273702	-		Serine carboxypeptidase-like 19	gene	protein_coding	0.00183931	70	0.316227								NAM_JL_25	αT3, ΣT3
δT	Zm00001d052314	4	186822052	186828926	-		Ubiquitin-activating enzyme E1 2	gene	protein_coding	0.00184498	71	0.320744
δT	Zm00001d034803	1	302454681	302456022	-		Ras-related protein RABA2a	gene	protein_coding	0.00187284	72	0.325262
δT	Zm00001d033552	1	266967929	266975303	+		ATPase 4 plasma membrane-type	gene	protein_coding	0.00203801	73	0.32978								NAM_JL_6	αT3
δT	Zm00001d012853	5	1115868	1118754	+		B-cell receptor-associated protein 31-like	gene	protein_coding	0.00207344	74	0.334297								NAM_JL_23	δT3, ΣTT3
δT	Zm00001d024830	10	90117995	90129224	+		Protease Do-like 2 chloroplastic	gene	protein_coding	0.00211195	75	0.338815								NAM_JL_51	αT3, ΣT3
δT	Zm00001d043400	3	198764862	198766666	-			gene	protein_coding	0.00222529	76	0.343332								NAM_JL_18	αT, γT, ΣT, δT3
δT	Zm00001d053872	4	242631115	242643653	+		DNA-directed RNA polymerase V subunit 1	gene	protein_coding	0.00224425	77	0.34785
δT	Zm00001d021948	7	166828550	166830651	+		Probable serine/threonine-protein kinase WNK11	gene	protein_coding	0.00246544	78	0.352367
δT	Zm00001d003846	2	61944273	61948903	+		Mitochondrial import inner membrane translocase subunit Tim17/Tim22/Tim23 family protein	gene	protein_coding	0.00249822	79	0.356885								NAM_JL_10	δT, γT, αT3, γT3, ΣT3	2_40566359	0.06	-21377914	-21382544
δT	Zm00001d038292	6	153563038	153569387	-		Syntaxin/t-SNARE family protein	gene	protein_coding	0.00253282	80	0.361402
δT	Zm00001d052037	4	177039992	177040731	+			gene	protein_coding	0.00255488	81	0.36592								NAM_JL_22	αT
δT	Zm00001d045729	9	35624307	35627408	+		Protein NSP-INTERACTING KINASE 1	gene	protein_coding	0.00257214	82	0.370437								NAM_JL_45	αT, δT, γT, ΣT, αT3, δT3, γT3, ΣT3, ΣTT3	9_28530922	0.22	-7093385	-7096486
δT	Zm00001d044129	3	219979958	219989574	-	shrunken2	Glucose-1-phosphate adenylyltransferase large subunit 1%252C chloroplastic/amyloplastic	gene	protein_coding	0.00258497	83	0.374955
δT	Zm00001d025170	10	107470951	107474926	+	stearoyl-acyl-carrier-protein desaturase11	stearoyl-acyl-carrier-protein desaturase11	gene	protein_coding	0.00259539	84	0.379472								NAM_JL_51	αT3, ΣT3
δT	Zm00001d053528	4	233126072	233126482	-		Cwf21	gene	protein_coding	0.00262604	85	0.38399
δT	Zm00001d008725	8	17921480	17928452	-		Putative DEAD-box ATP-dependent RNA helicase family protein	gene	protein_coding	0.00264233	86	0.388507
δT	Zm00001d022384	7	176522352	176525437	-			gene	protein_coding	0.00265715	87	0.393025
δT	Zm00001d052028	4	176844373	176866604	+		protein kinase family protein / WD-40 repeat family protein	gene	protein_coding	0.00270533	88	0.397542								NAM_JL_22	αT
δT	Zm00001d016803	5	176578339	176584546	+	p15 (PC4 Sub1)-transcription factor 2	RNA polymerase II transcriptional coactivator KIWI	gene	protein_coding	0.0027161	89	0.40206
δT	Zm00001d030217	1	113696772	113712522	+		Whole genome shotgun sequence of line PN40024 scaffold_7.assembly12x (Fragment)	gene	protein_coding	0.00272345	90	0.406578								NAM_JL_4	δT, δT3, γT3, ΣT3, ΣTT3	1_175971729	0.92	62274957	62259207
δT	Zm00001d046499	9	92565565	92566347	-		DNA binding%3BDNA-directed RNA polymerases	gene	protein_coding	0.00275115	91	0.411095								NAM_JL_45	αT, δT, γT, ΣT, αT3, δT3, γT3, ΣT3, ΣTT3	9_28530922	0.22	-64034643	-64035425
δT	Zm00001d053713	4	239697573	239699575	+		Ribosome-like protein	gene	protein_coding	0.00279202	92	0.415613
δT	Zm00001d023299	10	2352030	2356262	+		Zinc finger CCCH domain-containing protein 46	gene	protein_coding	0.00282636	93	0.42013
δT	Zm00001d043735	3	208692615	208694505	-		Bidirectional sugar transporter SWEET2	gene	protein_coding	0.00284025	94	0.424648								NAM_JL_18	αT, γT, ΣT, δT3
δT	Zm00001d012404	8	173912366	173925507	+		myb domain protein 3r-3	gene	protein_coding	0.00286446	95	0.429165
δT	Zm00001d052945	4	205815603	205819193	+		Probable ribonuclease P/MRP protein subunit POP5	gene	protein_coding	0.00290174	96	0.433683
δT	Zm00001d002235	2	8470331	8477172	-			gene	protein_coding	0.0029142	97	0.4382
δT	Zm00001d043158	3	190365000	190368453	-	beta tubulin6b	beta tubulin6b	gene	protein_coding	0.00292461	98	0.442718								NAM_JL_18	αT, γT, ΣT, δT3
δT	Zm00001d027674	1	10755659	10757365	-			gene	protein_coding	0.00292797	99	0.447235								NAM_JL_2	γT, δT3
δT	Zm00001d044394	3	227051751	227054558	+			gene	protein_coding	0.0030448	100	0.451753
δT	Zm00001d022027	7	168263270	168265912	-			gene	protein_coding	0.00305054	101	0.45627
δT	Zm00001d015851	5	126267825	126285618	+		Tubulin binding cofactor C domain-containing protein	gene	protein_coding	0.00305343	102	0.460788								NAM_JL_26	δT, γT, ΣT, δT3, γT3, ΣT3, ΣTT3	5_146752702	0.7	20484877	20467084
δT	Zm00001d040157	3	29588852	29590774	-		Cation/calcium exchanger 4	gene	protein_coding	0.0030999	103	0.465305								NAM_JL_14	αT3, δT3, γT3, ΣT3
δT	Zm00001d053860	4	242400871	242404592	-		MEI2 C-terminal RRM only like 1	gene	protein_coding	0.00312459	104	0.469823
δT	Zm00001d015965	5	134675256	134676923	-		protein%3B Tyrosine specific protein phosphatase-like	gene	protein_coding	0.00319821	105	0.47434								NAM_JL_26	δT, γT, ΣT, δT3, γT3, ΣT3, ΣTT3	5_146752702	0.7	12077446	12075779
δT	Zm00001d051157	4	146405890	146410901	-		Adenosine kinase 2	gene	protein_coding	0.00320459	106	0.478858								NAM_JL_21	δT, γT, ΣT, αT3, δT3, γT3, ΣT3, ΣTT3	4_28551570	0.24	-117854320	-117859331
δT	Zm00001d015435	5	90052984	90074741	-		Protein STRUBBELIG-RECEPTOR FAMILY 1	gene	protein_coding	0.00321858	107	0.483375								NAM_JL_26	δT, γT, ΣT, δT3, γT3, ΣT3, ΣTT3	5_146752702	0.7	56699718	56677961
δT	Zm00001d038574	6	160173085	160179557	-	bZIP-transcription factor 73	Basic leucine zipper 24	gene	protein_coding	0.00323039	108	0.487893
δT	Zm00001d008591	8	13719470	13722383	-		Octicosapeptide/Phox/Bem1p family protein	gene	protein_coding	0.00324825	109	0.492411
δT	Zm00001d053273	4	223581945	223588791	+		Adhesin FhaB [Source:UniProtKB/TrEMBL%3BAcc:B4FPB1]	gene	protein_coding	0.00325699	110	0.496928
δT3	Zm00001d015234	5	80281071	80289642	-		Cycloartenol synthase	gene	protein_coding	7.84e-07	1	0.00451753
δT3	Zm00001d015997	5	138120817	138128265	+			gene	protein_coding	6.08e-06	2	0.00903506								NAM_JL_26	δT, γT, ΣT, δT3, γT3, ΣT3, ΣTT3
δT3	Zm00001d028162	1	24771608	24778825	-	sulfate permease1	sulfate permease1	gene	protein_coding	1.39e-05	3	0.0135526
δT3	Zm00001d006458	2	208855966	208856205	+			gene	protein_coding	2.37e-05	4	0.0180701
δT3	Zm00001d039108	6	170139690	170140607	-		Plant-specific domain TIGR01570 family protein	gene	protein_coding	6.56e-05	5	0.0225876
δT3	Zm00001d046558	9	95895575	95899061	+	homogentisate geranylgeranyl transferase1	homogentisate geranylgeranyl transferase1	gene	protein_coding	7.39e-05	6	0.0271052	Yes	δT3_2	1.37e-11	2259	0.0187958	68343	64857	NAM_JL_45	αT, δT, γT, ΣT, αT3, δT3, γT3, ΣT3, ΣTT3	9_95890334	0.91	-5241	-8727
δT3	Zm00001d016006	5	138912225	138921418	+		D-amino-acid transaminase chloroplastic	gene	protein_coding	8.03e-05	7	0.0316227								NAM_JL_26	δT, γT, ΣT, δT3, γT3, ΣT3, ΣTT3
δT3	Zm00001d010651	8	122974459	122974956	-			gene	protein_coding	0.000100008	8	0.0361402								NAM_JL_41	αT, γT, ΣT, δT3, ΣTT3	8_148945511	0.18	25971052	25970555
δT3	Zm00001d007661	2	237091675	237098914	-		Glutathione synthetase chloroplastic	gene	protein_coding	0.000100531	9	0.0406578
δT3	Zm00001d044288	3	224349905	224352639	+		alpha/beta-Hydrolases superfamily protein	gene	protein_coding	0.000105178	10	0.0451753
δT3	Zm00001d028010	1	20263677	20268913	-		conserved oligomeric Golgi complex component-related / COG complex component-related	gene	protein_coding	0.000109537	11	0.0496928								NAM_JL_2	γT, δT3	1_16288571	0.08	-3975106	-3980342
δT3	Zm00001d009848	8	84947841	84951081	+		60S ribosomal protein L18-3	gene	protein_coding	0.00011537	12	0.0542103
δT3	Zm00001d023376	10	4272268	4274843	-	aluminum-induced protein homolog1	aluminum-induced protein homolog1	gene	protein_coding	0.000119194	13	0.0587279
δT3	Zm00001d031737	1	200260170	200262141	-		NC domain-containing protein-related	gene	protein_coding	0.000121794	14	0.0632454
δT3	Zm00001d009010	8	30106964	30108529	-		Plasma membrane-associated cation-binding protein 1	gene	protein_coding	0.00016687	15	0.0677629
δT3	Zm00001d050753	4	120953532	120958594	-	DDT-transcription factor 2	DDT domain-containing protein	gene	protein_coding	0.000185507	16	0.0722804								NAM_JL_21	δT, γT, ΣT, αT3, δT3, γT3, ΣT3, ΣTT3	4_85920650	0.17	-35032882	-35037944
δT3	Zm00001d033128	1	251575859	251578200	+		60S ribosomal protein L10-3	gene	protein_coding	0.000223494	17	0.076798
δT3	Zm00001d009891	8	87730225	87731601	-			gene	protein_coding	0.000234762	18	0.0813155
δT3	Zm00001d021455	7	152642179	152642637	-		SAUR52-auxin-responsive SAUR family member	gene	protein_coding	0.000256761	19	0.085833
δT3	Zm00001d026614	10	148995156	149000603	+		Probable protein arginine N-methyltransferase 6	gene	protein_coding	0.000265477	20	0.0903506
δT3	Zm00001d005874	2	191436169	191438639	-			gene	protein_coding	0.000313083	21	0.0948681								NAM_JL_11	γT, ΣT, ΣTT3
δT3	Zm00001d010282	8	107273501	107276222	-		Single-stranded nucleic acid binding R3H protein	gene	protein_coding	0.00031531	22	0.0993856
δT3	Zm00001d024594	10	79726997	79731279	+		Monocopper oxidase	gene	protein_coding	0.000327143	23	0.103903
δT3	Zm00001d040831	3	68533978	68545245	-		ISWI chromatin-remodeling complex ATPase CHR11	gene	protein_coding	0.000361035	24	0.108421								NAM_JL_14	αT3, δT3, γT3, ΣT3
δT3	Zm00001d016907	5	179669837	179673125	+	E2F-DP-transcription factor 28	Purple acid phosphatase 3	gene	protein_coding	0.000361512	25	0.112938
δT3	Zm00001d047828	9	142625874	142631952	-		Protein TOC75-3 chloroplastic	gene	protein_coding	0.000367082	26	0.117456
δT3	Zm00001d012652	8	177983385	177988780	+		Signal recognition particle 54 kDa protein 3	gene	protein_coding	0.000372344	27	0.121973								NAM_JL_43	αT3, δT3, γT3	8_179125673	0.27	1142288	1136893
δT3	Zm00001d006131	2	199416217	199426495	-		BAG-associated GRAM protein 1	gene	protein_coding	0.000423185	28	0.126491								NAM_JL_11	γT, ΣT, ΣTT3
δT3	Zm00001d021943	7	166612267	166619169	-			gene	protein_coding	0.000447568	29	0.131008
δT3	Zm00001d017871	5	209242050	209250119	+		Protein S-acyltransferase 18	gene	protein_coding	0.00046848	30	0.135526								NAM_JL_29	δT, δT3, ΣTT3	5_210241256	0.68	999206	991137
δT3	Zm00001d017935	5	210378851	210382756	+		zinc ion binding	gene	protein_coding	0.000476055	31	0.140043								NAM_JL_29	δT, δT3, ΣTT3	5_210241256	0.68	-137595	-141500
δT3	Zm00001d002338	2	10590637	10594877	+		UDP-N-acetylglucosamine diphosphorylase 2	gene	protein_coding	0.00050016	32	0.144561
δT3	Zm00001d046613	9	98839260	98845509	+		Elongator complex protein 4	gene	protein_coding	0.000538435	33	0.149078								NAM_JL_45	αT, δT, γT, ΣT, αT3, δT3, γT3, ΣT3, ΣTT3	9_95890334	0.91	-2948926	-2955175
δT3	Zm00001d015974	5	135675287	135687534	-		Leucine Rich Repeat family protein	gene	protein_coding	0.000656139	34	0.153596								NAM_JL_26	δT, γT, ΣT, δT3, γT3, ΣT3, ΣTT3
δT3	Zm00001d020623	7	125321586	125322729	+		Copper transporter 5	gene	protein_coding	0.000676426	35	0.158113
δT3	Zm00001d042694	3	177266069	177275631	+		Putative ion channel protein POLLUX	gene	protein_coding	0.000680386	36	0.162631								NAM_JL_16	δT
δT3	Zm00001d020711	7	129697273	129712944	+		ABSCISIC ACID-INSENSITIVE 5-like protein 5	gene	protein_coding	0.000684205	37	0.167149
δT3	Zm00001d035878	6	58271035	58276115	-		aminopeptidases	gene	protein_coding	0.00075053	38	0.171666								NAM_JL_30	γT, ΣT, δT3, γT3, ΣT3, ΣTT3	6_75752329	0.36	17481294	17476214
δT3	Zm00001d045516	9	25240624	25249861	+		Probable transcriptional regulator SLK2	gene	protein_coding	0.000752052	39	0.176184
δT3	Zm00001d053913	4	243607475	243612187	+		HVA22-like protein i	gene	protein_coding	0.000796772	40	0.180701
δT3	Zm00001d005997	2	194951202	194954366	-		WPP domain-interacting protein 2	gene	protein_coding	0.000809179	41	0.185219								NAM_JL_11	γT, ΣT, ΣTT3
δT3	Zm00001d019060	7	14494700	14497925	+	deoxy xylulose synthase 2	deoxy xylulose synthase 2	gene	protein_coding	0.000809276	42	0.189736	Yes							NAM_JL_35	δT3, γT3, ΣT3, ΣTT3	7_14403460	0.73	-91240	-94465
δT3	Zm00001d015988	5	137084108	137087008	-		Cytochrome c-type biogenesis CcmH-like mitochondrial protein	gene	protein_coding	0.000811075	43	0.194254								NAM_JL_26	δT, γT, ΣT, δT3, γT3, ΣT3, ΣTT3
δT3	Zm00001d048892	4	7220930	7224183	-		Thioredoxin domain-containing protein PLP3B	gene	protein_coding	0.000824511	44	0.198771
δT3	Zm00001d048546	9	158404988	158464567	-		transcription regulators	gene	protein_coding	0.000837714	45	0.203289
δT3	Zm00001d015327	5	84630842	84634232	-	ubiquitin1	ubiquitin1	gene	protein_coding	0.000875856	46	0.207806								NAM_JL_26	δT, γT, ΣT, δT3, γT3, ΣT3, ΣTT3
δT3	Zm00001d023439	10	5628583	5632451	+		Ribonuclease H2 subunit A	gene	protein_coding	0.000876269	47	0.212324
δT3	Zm00001d004052	2	79610945	79613138	+		60S ribosomal protein L35	gene	protein_coding	0.000897734	48	0.216841								NAM_JL_10	δT, γT, αT3, γT3, ΣT3
δT3	Zm00001d044814	9	3484823	3499021	+		Protein kinase domain superfamily protein	gene	protein_coding	0.000905424	49	0.221359
δT3	Zm00001d003709	2	55723782	55724426	+		Cell wall / vacuolar inhibitor of fructosidase 2	gene	protein_coding	0.000953414	50	0.225876								NAM_JL_10	δT, γT, αT3, γT3, ΣT3
δT3	Zm00001d014953	5	69658246	69679397	-		Ferrochelatase	gene	protein_coding	0.00101706	51	0.230394								NAM_JL_25	αT3, ΣT3
δT3	Zm00001d025861	10	131797076	131799846	+	NAC-transcription factor 65	NAC domain containing protein 74	gene	protein_coding	0.00108857	52	0.234911
δT3	Zm00001d032566	1	230666267	230672973	-			gene	protein_coding	0.00110412	53	0.239429								NAM_JL_5	αT, δT, γT, ΣT, δT3, γT3, ΣTT3	1_227986153	0.25	-2680114	-2686820
δT3	Zm00001d034198	1	286411877	286413004	+		Protein PHLOEM PROTEIN 2-LIKE A10	gene	protein_coding	0.00110845	54	0.243947
δT3	Zm00001d042427	3	166932057	166935803	-		Ribosomal protein S24/S35 mitochondrial	gene	protein_coding	0.00112703	55	0.248464								NAM_JL_15	αT
δT3	Zm00001d046183	9	70138991	70155350	+		50S ribosomal protein L1	gene	protein_coding	0.0011583	56	0.252982								NAM_JL_45	αT, δT, γT, ΣT, αT3, δT3, γT3, ΣT3, ΣTT3	9_95890334	0.91	25751343	25734984
δT3	Zm00001d033237	1	255361226	255391452	-		Uncharacterised conserved protein UCP031088 alpha/beta hydrolase	gene	protein_coding	0.0011858	57	0.257499
δT3	Zm00001d017070	5	184384820	184385557	-			gene	protein_coding	0.00124654	58	0.262017
δT3	Zm00001d028392	1	33147676	33150346	-		actin depolymerizing factor5	gene	protein_coding	0.00125106	59	0.266534								NAM_JL_3	αT, δT, γT, ΣT, αT3, ΣTT3
δT3	Zm00001d044663	3	234337616	234340997	+		Exostosin family protein	gene	protein_coding	0.00128356	60	0.271052								NAM_JL_19	αT3
δT3	Zm00001d032788	1	238190770	238192464	-		GDSL esterase/lipase LTL1	gene	protein_coding	0.00134655	61	0.275569								NAM_JL_5	αT, δT, γT, ΣT, δT3, γT3, ΣTT3	1_227986153	0.25	-10204617	-10206311
δT3	Zm00001d046799	9	106453899	106454677	+			gene	protein_coding	0.00136665	62	0.280087								NAM_JL_45	αT, δT, γT, ΣT, αT3, δT3, γT3, ΣT3, ΣTT3	9_95890334	0.91	-10563565	-10564343
δT3	Zm00001d052989	4	207785244	207786582	+		Cysteine-rich receptor-like protein kinase 6	gene	protein_coding	0.00137086	63	0.284604
δT3	Zm00001d045379	9	20170773	20183177	-		Coatomer subunit beta'-3	gene	protein_coding	0.00147487	64	0.289122								NAM_JL_44	PC8
δT3	Zm00001d031073	1	175980669	175983357	-	origin recognition complex3	Origin recognition complex subunit 3	gene	protein_coding	0.00148045	65	0.293639								NAM_JL_4	δT, δT3, γT3, ΣT3, ΣTT3	1_175998848	0.69	18179	15491
δT3	Zm00001d027344	1	3371324	3374866	+		Major facilitator superfamily protein	gene	protein_coding	0.0014828	66	0.298157
δT3	Zm00001d014950	5	69573089	69578098	+		Peptidase C78 ubiquitin fold modifier-specific peptidase 1/ 2	gene	protein_coding	0.00157195	67	0.302674								NAM_JL_25	αT3, ΣT3
δT3	Zm00001d034422	1	292520815	292523078	-		40S ribosomal protein S18	gene	protein_coding	0.00159073	68	0.307192
δT3	Zm00001d017953	5	210785282	210790516	+		Probable peroxygenase 4	gene	protein_coding	0.00159261	69	0.311709								NAM_JL_29	δT, δT3, ΣTT3	5_210241256	0.68	-544026	-549260
δT3	Zm00001d024830	10	90117995	90129224	+		Protease Do-like 2 chloroplastic	gene	protein_coding	0.00160169	70	0.316227								NAM_JL_51	αT3, ΣT3
δT3	Zm00001d008382	8	6829899	6834351	-		Cationic amino acid transporter 6 chloroplastic	gene	protein_coding	0.00160367	71	0.320744
δT3	Zm00001d054104	4	246521633	246556919	+		ATP binding microtubule motor family protein	gene	protein_coding	0.00161581	72	0.325262
δT3	Zm00001d018867	7	7839802	7844665	-		Syntaxin 132	gene	protein_coding	0.00164095	73	0.32978
δT3	Zm00001d014769	5	62502568	62505907	+			gene	protein_coding	0.00164317	74	0.334297								NAM_JL_25	αT3, ΣT3
δT3	Zm00001d042966	3	185204150	185206008	+		40S ribosomal protein S23-2	gene	protein_coding	0.00164362	75	0.338815								NAM_JL_17	ΣTT3
δT3	Zm00001d053559	4	234082150	234089274	-		Nuclear poly(A) polymerase 2	gene	protein_coding	0.00166025	76	0.343332
δT3	Zm00001d046254	9	76891003	76909916	+		Anther-specific proline-rich protein APG	gene	protein_coding	0.00166303	77	0.34785								NAM_JL_45	αT, δT, γT, ΣT, αT3, δT3, γT3, ΣT3, ΣTT3	9_95890334	0.91	18999331	18980418
δT3	Zm00001d017964	5	210959844	210965383	+		Putative RNA-dependent RNA polymerase	gene	protein_coding	0.00174459	78	0.352367
δT3	Zm00001d035476	6	28516750	28525006	-		L-type lectin-domain containing receptor kinase VIII.1	gene	protein_coding	0.00175657	79	0.356885
δT3	Zm00001d011418	8	149939788	149946885	-		cytochrome P450 family 72 subfamily A polypeptide 8	gene	protein_coding	0.00175792	80	0.361402								NAM_JL_41	αT, γT, ΣT, δT3, ΣTT3	8_148945511	0.18	-994277	-1001374
δT3	Zm00001d021225	7	146550796	146555239	-		RING/U-box superfamily protein	gene	protein_coding	0.00177056	81	0.36592								NAM_JL_38	αT
δT3	Zm00001d015992	5	137788352	137823207	-			gene	protein_coding	0.0018361	82	0.370437								NAM_JL_26	δT, γT, ΣT, δT3, γT3, ΣT3, ΣTT3
δT3	Zm00001d037404	6	124631112	124634021	+		Steroid nuclear receptor ligand-binding	gene	protein_coding	0.00184173	83	0.374955
δT3	Zm00001d025846	10	131474854	131478746	-		Beta-glucosidase 47	gene	protein_coding	0.00184321	84	0.379472
δT3	Zm00001d024674	10	83251939	83254248	+		Multiple organellar RNA editing factor 9 chloroplastic	gene	protein_coding	0.00187954	85	0.38399								NAM_JL_51	αT3, ΣT3
δT3	Zm00001d027965	1	18511901	18513196	+		Aspartyl protease AED3	gene	protein_coding	0.00190466	86	0.388507								NAM_JL_2	γT, δT3	1_16288571	0.08	-2223330	-2224625
δT3	Zm00001d052946	4	205821051	205824128	-		OSJNBb0045P24.5 protein	gene	protein_coding	0.00195175	87	0.393025
δT3	Zm00001d046972	9	113640887	113645997	-		Probable CDP-diacylglycerol--inositol 3-phosphatidyltransferase 2	gene	protein_coding	0.0019542	88	0.397542
δT3	Zm00001d052405	4	189190071	189194808	-	WRI1 transcription factor2	WRI1 transcription factor2	gene	protein_coding	0.00197231	89	0.40206
δT3	Zm00001d029201	1	62065593	62069082	-		50S ribosomal protein L6	gene	protein_coding	0.00200197	90	0.406578
δT3	Zm00001d025580	10	122855595	122861043	-	somatic embryogenesis receptor-like kinase1	somatic embryogenesis receptor-like kinase1	gene	protein_coding	0.00202759	91	0.411095
δT3	Zm00001d011981	8	165739738	165746851	+		GYF domain-containing protein	gene	protein_coding	0.00205095	92	0.415613
δT3	Zm00001d037720	6	135179680	135182581	+		Esterase/lipase/thioesterase family protein	gene	protein_coding	0.00208466	93	0.42013								NAM_JL_32	αT, γT3, ΣT3, ΣTT3
δT3	Zm00001d020234	7	101492829	101504550	-		THO complex subunit 6	gene	protein_coding	0.00209177	94	0.424648								NAM_JL_36	δT, αT3, δT3	7_34277444	0.59	-67215385	-67227106
δT3	Zm00001d012824	5	928945	929484	+		RNA binding protein	gene	protein_coding	0.00209463	95	0.429165								NAM_JL_23	δT3, ΣTT3	5_1505511	0.17	576566	576027
δT3	Zm00001d050463	4	90402428	90420961	-			gene	protein_coding	0.00222127	96	0.433683								NAM_JL_21	δT, γT, ΣT, αT3, δT3, γT3, ΣT3, ΣTT3	4_85920650	0.17	-4481778	-4500311
δT3	Zm00001d011055	8	137530714	137531411	+			gene	protein_coding	0.00231194	97	0.4382								NAM_JL_41	αT, γT, ΣT, δT3, ΣTT3	8_148945511	0.18	11414797	11414100
δT3	Zm00001d049494	4	32383217	32386961	-	sigma factor 1B	sigma factor 1B	gene	protein_coding	0.00232285	98	0.442718								NAM_JL_21	δT, γT, ΣT, αT3, δT3, γT3, ΣT3, ΣTT3	4_85920650	0.17	53537433	53533689
δT3	Zm00001d048508	9	157537064	157537579	-		OJ000126_13.10 protein%3B protein	gene	protein_coding	0.00232788	99	0.447235
δT3	Zm00001d017559	5	199535385	199538423	-		basic helix-loop-helix (bHLH) DNA-binding superfamily protein	gene	protein_coding	0.00233924	100	0.451753								NAM_JL_27	δT
δT3	Zm00001d034768	1	301674705	301677768	+		Glycine-rich RNA-binding protein RZ1A	gene	protein_coding	0.00236098	101	0.45627
δT3	Zm00001d046549	9	95423390	95429102	-		110 kDa U5 small nuclear ribonucleoprotein component CLO	gene	protein_coding	0.0023677	102	0.460788								NAM_JL_45	αT, δT, γT, ΣT, αT3, δT3, γT3, ΣT3, ΣTT3	9_95890334	0.91	466944	461232
δT3	Zm00001d033968	1	279874490	279875745	+		response regulator 24	gene	protein_coding	0.00238482	103	0.465305
δT3	Zm00001d015473	5	92107583	92115114	+		Protein transport protein SEC61 gamma subunit	gene	protein_coding	0.00239093	104	0.469823								NAM_JL_26	δT, γT, ΣT, δT3, γT3, ΣT3, ΣTT3
δT3	Zm00001d029264	1	64207240	64216522	+		CDPK-related kinase 1	gene	protein_coding	0.00239454	105	0.47434
δT3	Zm00001d011525	8	153516587	153522891	+		Mitogen-activated protein kinase 20	gene	protein_coding	0.00243623	106	0.478858
δT3	Zm00001d036567	6	92808875	92811320	-		40S ribosomal protein S14-3	gene	protein_coding	0.00245581	107	0.483375
δT3	Zm00001d042812	3	180955995	180958405	-		Tetratricopeptide repeat (TPR)-like superfamily protein	gene	protein_coding	0.00250203	108	0.487893
δT3	Zm00001d031183	1	181580507	181584714	-		ankyrin repeat family protein	gene	protein_coding	0.00250468	109	0.492411								NAM_JL_4	δT, δT3, γT3, ΣT3, ΣTT3	1_175998848	0.69	-5581659	-5585866
δT3	Zm00001d045113	9	13149723	13154901	-		Calcineurin-like metallo-phosphoesterase superfamily protein	gene	protein_coding	0.00254723	110	0.496928
ΣT	Zm00001d013937	5	25431430	25434346	-	GRMZM2G073351	Protochlorophyllide reductase C chloroplastic	gene	protein_coding	2.08e-08	1	0.00451753	Yes	ΣT_3	1.54e-14	1	8.32041e-06	3519	603	NAM_JL_24	αT, δT, γT, ΣT, δT3, γT3, ΣTT3	5_25433577	0.9	2147	-769
ΣT	Zm00001d032576	1	231120510	231123615	-	GRMZM2G036455	Protochlorophyllide reductase C chloroplastic	gene	protein_coding	4.94e-08	2	0.00903506	Yes	ΣT_2	1.88e-08	28	0.000232971	3936	831	NAM_JL_5	αT, δT, γT, ΣT, δT3, γT3, ΣTT3	1_231304479	0.54	183969	180864
ΣT	Zm00001d044017	3	216717307	216725476	-		Probable plastid-lipid-associated protein 14 chloroplastic	gene	protein_coding	1.72e-06	3	0.0135526
ΣT	Zm00001d032566	1	230666267	230672973	-			gene	protein_coding	4.31e-06	4	0.0180701								NAM_JL_5	αT, δT, γT, ΣT, δT3, γT3, ΣTT3	1_231304479	0.54	638212	631506
ΣT	Zm00001d013933	5	25177803	25179923	-		CBS domain-containing protein CBSX5	gene	protein_coding	6.88e-06	5	0.0225876								NAM_JL_24	αT, δT, γT, ΣT, δT3, γT3, ΣTT3	5_25433577	0.9	255774	253654
ΣT	Zm00001d021244	7	146789970	146799955	-			gene	protein_coding	9.33e-06	6	0.0271052
ΣT	Zm00001d026382	10	144818522	144822103	-		G-type lectin S-receptor-like serine/threonine-protein kinase B120	gene	protein_coding	4.71e-05	7	0.0316227								NAM_JL_52	δT, γT, ΣT, ΣTT3	10_145879135	0.77	1060613	1057032
ΣT	Zm00001d006437	2	208168131	208169072	+		Monothiol glutaredoxin-S17	gene	protein_coding	4.78e-05	8	0.0361402
ΣT	Zm00001d016581	5	168223687	168255407	+		DNA polymerase epsilon catalytic subunit A	gene	protein_coding	6.17e-05	9	0.0406578
ΣT	Zm00001d008752	8	18999372	19006082	-		Calcium-dependent lipid-binding (CaLB domain) family protein	gene	protein_coding	0.000170366	10	0.0451753
ΣT	Zm00001d010062	8	97855255	97858701	-		Rop guanine nucleotide exchange factor 7	gene	protein_coding	0.000188728	11	0.0496928
ΣT	Zm00001d002685	2	19212994	19214316	-		Thioredoxin-like 3-3	gene	protein_coding	0.000283748	12	0.0542103
ΣT	Zm00001d010742	8	126451432	126451995	+		Putative pentatricopeptide repeat-containing protein	gene	protein_coding	0.000318769	13	0.0587279								NAM_JL_41	αT, γT, ΣT, δT3, ΣTT3
ΣT	Zm00001d005478	2	175506166	175511789	+		Cellulose synthase A catalytic subunit 5 [UDP-forming]	gene	protein_coding	0.000341023	14	0.0632454
ΣT	Zm00001d047911	9	145078478	145081740	+		HVA22-like protein i	gene	protein_coding	0.000348687	15	0.0677629
ΣT	Zm00001d040941	3	81369102	81382294	-		Chaperone protein dnaJ 50	gene	protein_coding	0.000418627	16	0.0722804								NAM_JL_14	αT3, δT3, γT3, ΣT3
ΣT	Zm00001d017951	5	210778082	210779268	+		Nudix hydrolase 17 mitochondrial	gene	protein_coding	0.000436936	17	0.076798								NAM_JL_29	δT, δT3, ΣTT3
ΣT	Zm00001d033981	1	279982395	279986186	-	ATP sulfurylase1	ATP sulfurylase1	gene	protein_coding	0.000539046	18	0.0813155
ΣT	Zm00001d030129	1	107865921	107867117	-		S-adenosyl-L-methionine-dependent methyltransferases superfamily protein	gene	protein_coding	0.000578294	19	0.085833								NAM_JL_4	δT, δT3, γT3, ΣT3, ΣTT3
ΣT	Zm00001d004019	2	76032746	76036570	+	stearoyl-acyl-carrier-protein desaturase5	stearoyl-acyl-carrier-protein desaturase5	gene	protein_coding	0.000670421	20	0.0903506								NAM_JL_10	δT, γT, αT3, γT3, ΣT3
ΣT	Zm00001d018891	7	8478320	8494304	-	chloroplast RNA processing4	chloroplast RNA processing4	gene	protein_coding	0.000673803	21	0.0948681
ΣT	Zm00001d041977	3	146369021	146370053	-		Glutathione S-transferase T1	gene	protein_coding	0.00068965	22	0.0993856								NAM_JL_14	αT3, δT3, γT3, ΣT3
ΣT	Zm00001d049253	4	22955772	22957129	+		40S ribosomal protein S4-3	gene	protein_coding	0.0007136	23	0.103903
ΣT	Zm00001d015208	5	79389803	79395312	+		Cleavage and polyadenylation specificity factor (CPSF) A subunit protein	gene	protein_coding	0.000746875	24	0.108421
ΣT	Zm00001d047323	9	126607955	126611605	+		Probable magnesium transporter NIPA8	gene	protein_coding	0.000769482	25	0.112938
ΣT	Zm00001d016748	5	174862785	174863648	-		Protein MKS1	gene	protein_coding	0.000805871	26	0.117456
ΣT	Zm00001d043296	3	194966876	194977775	+		zinc knuckle (CCHC-type) family protein	gene	protein_coding	0.000815035	27	0.121973								NAM_JL_18	αT, γT, ΣT, δT3	3_193062452	0.08	-1904424	-1915323
ΣT	Zm00001d053778	4	240939248	240942799	+		Cell division control protein 50	gene	protein_coding	0.000835801	28	0.126491
ΣT	Zm00001d007471	2	232434738	232435620	+			gene	protein_coding	0.000929769	29	0.131008
ΣT	Zm00001d048171	9	151310394	151315075	-	chloroplast RNA splicing4	Protein CLT2 chloroplastic	gene	protein_coding	0.000941107	30	0.135526								NAM_JL_47	δT
ΣT	Zm00001d047713	9	139754473	139758419	-		Eukaryotic translation initiation factor 2 subunit alpha	gene	protein_coding	0.000975058	31	0.140043								NAM_JL_46	γT, ΣT	9_140837185	0.18	1082712	1078766
ΣT	Zm00001d037494	6	127256992	127257723	+		Sterile alpha motif (SAM) domain-containing protein	gene	protein_coding	0.00100924	32	0.144561								NAM_JL_32	αT, γT3, ΣT3, ΣTT3
ΣT	Zm00001d032424	1	225982558	225987682	+		Probable sodium/metabolite cotransporter BASS1 chloroplastic	gene	protein_coding	0.0010602	33	0.149078								NAM_JL_5	αT, δT, γT, ΣT, δT3, γT3, ΣTT3	1_231304479	0.54	5321921	5316797
ΣT	Zm00001d044042	3	217573164	217581039	+	malate dehydrogenase3	malate dehydrogenase3	gene	protein_coding	0.00109123	34	0.153596
ΣT	Zm00001d039026	6	168872299	168875758	-		F-box protein family-like protein	gene	protein_coding	0.00116748	35	0.158113								NAM_JL_34	PC8
ΣT	Zm00001d008724	8	17871316	17876968	-		Protein NSP-INTERACTING KINASE 3	gene	protein_coding	0.00117248	36	0.162631
ΣT	Zm00001d021445	7	152358112	152359792	-		60S ribosomal protein L14-1	gene	protein_coding	0.00127325	37	0.167149
ΣT	Zm00001d017754	5	205924278	205940214	-		yeast YAK1-related gene 1	gene	protein_coding	0.0012788	38	0.171666								NAM_JL_28	αT, γT, αT3, γT3
ΣT	Zm00001d051594	4	164049037	164049507	-			gene	protein_coding	0.0013305	39	0.176184
ΣT	Zm00001d039378	3	2791183	2793926	+			gene	protein_coding	0.001366	40	0.180701
ΣT	Zm00001d017742	5	205734245	205737675	-	GRF-transcription factor 6	Growth-regulating factor 6	gene	protein_coding	0.00137423	41	0.185219								NAM_JL_28	αT, γT, αT3, γT3
ΣT	Zm00001d049624	4	37970635	37973407	-		Magnesium transporter CorA-like family protein	gene	protein_coding	0.0013952	42	0.189736								NAM_JL_21	δT, γT, ΣT, αT3, δT3, γT3, ΣT3, ΣTT3	4_29288877	0.34	-8681758	-8684530
ΣT	Zm00001d005833	2	190344608	190350123	+		Protein Brevis radix-like 4	gene	protein_coding	0.00142016	43	0.194254								NAM_JL_11	γT, ΣT, ΣTT3	2_201952809	0.28	11608201	11602686
ΣT	Zm00001d009648	8	74317968	74318441	-		Oleosin Bn-V	gene	protein_coding	0.00143207	44	0.198771
ΣT	Zm00001d049734	4	42094874	42102440	+		Putative 1-phosphatidylinositol-4-phosphate 5-kinase/ zinc ion binding family	gene	protein_coding	0.00151333	45	0.203289								NAM_JL_21	δT, γT, ΣT, αT3, δT3, γT3, ΣT3, ΣTT3	4_29288877	0.34	-12805997	-12813563
ΣT	Zm00001d019515	7	39145274	39160974	-		PTI1-like tyrosine-protein kinase 3	gene	protein_coding	0.00162594	46	0.207806								NAM_JL_36	δT, αT3, δT3
ΣT	Zm00001d033493	1	264224149	264230819	+		Cationic amino acid transporter 4 vacuolar	gene	protein_coding	0.00166485	47	0.212324								NAM_JL_6	αT3
ΣT	Zm00001d053273	4	223581945	223588791	+		Adhesin FhaB [Source:UniProtKB/TrEMBL%3BAcc:B4FPB1]	gene	protein_coding	0.00167009	48	0.216841
ΣT	Zm00001d048721	4	4184200	4187807	-		Lipase	gene	protein_coding	0.00169503	49	0.221359
ΣT	Zm00001d002833	2	24243407	24244918	+		Pepsin A	gene	protein_coding	0.00171262	50	0.225876								NAM_JL_9	ΣT	2_24216812	0.1	-26595	-28106
ΣT	Zm00001d044549	3	231411700	231414420	+			gene	protein_coding	0.0017209	51	0.230394								NAM_JL_19	αT3
ΣT	Zm00001d014598	5	54724156	54726135	+		Pentatricopeptide repeat-containing protein	gene	protein_coding	0.00172781	52	0.234911								NAM_JL_25	αT3, ΣT3
ΣT	Zm00001d033848	1	275704805	275707378	-	bHLH-transcription factor 137	Transcription factor bHLH18	gene	protein_coding	0.00174135	53	0.239429
ΣT	Zm00001d018091	5	214047482	214049911	-		Ornithine carbamoyltransferase chloroplastic	gene	protein_coding	0.00179325	54	0.243947
ΣT	Zm00001d011560	8	154457261	154486289	+	Homeobox-transcription factor 113	Homeobox-DDT domain protein RLT1	gene	protein_coding	0.00179471	55	0.248464
ΣT	Zm00001d046499	9	92565565	92566347	-		DNA binding%3BDNA-directed RNA polymerases	gene	protein_coding	0.00181804	56	0.252982								NAM_JL_45	αT, δT, γT, ΣT, αT3, δT3, γT3, ΣT3, ΣTT3	9_98832752	0.13	6267187	6266405
ΣT	Zm00001d034198	1	286411877	286413004	+		Protein PHLOEM PROTEIN 2-LIKE A10	gene	protein_coding	0.00192261	57	0.257499
ΣT	Zm00001d018358	5	219156200	219158425	+		Protein TIC 55 chloroplastic	gene	protein_coding	0.0019346	58	0.262017
ΣT	Zm00001d040279	3	35510649	35520277	-	topless-related1	topless-related1	gene	protein_coding	0.00194886	59	0.266534								NAM_JL_14	αT3, δT3, γT3, ΣT3
ΣT	Zm00001d009212	8	43471863	43480271	-		dihydrolipoyl dehydrogenases	gene	protein_coding	0.0019967	60	0.271052
ΣT	Zm00001d023492	10	7294593	7311266	-		RING/FYVE/PHD zinc finger superfamily protein	gene	protein_coding	0.00206281	61	0.275569								NAM_JL_48	αT3
ΣT	Zm00001d053616	4	236545424	236550919	+		26S protease regulatory subunit 8 homolog B	gene	protein_coding	0.00206526	62	0.280087
ΣT	Zm00001d040628	3	55023821	55026070	+			gene	protein_coding	0.00206528	63	0.284604								NAM_JL_14	αT3, δT3, γT3, ΣT3
ΣT	Zm00001d042395	3	164412499	164415646	-		Mitochondrial import inner membrane translocase subunit TIM16	gene	protein_coding	0.00208666	64	0.289122								NAM_JL_15	αT
ΣT	Zm00001d046060	9	60497376	60505212	-		CMP-sialic acid transporter 1	gene	protein_coding	0.00215511	65	0.293639								NAM_JL_45	αT, δT, γT, ΣT, αT3, δT3, γT3, ΣT3, ΣTT3	9_98832752	0.13	38335376	38327540
ΣT	Zm00001d011796	8	161717957	161722781	-		Putative mitochondrial processing peptidase alpha subunit family protein	gene	protein_coding	0.00219579	66	0.298157
ΣT	Zm00001d033237	1	255361226	255391452	-		Uncharacterised conserved protein UCP031088 alpha/beta hydrolase	gene	protein_coding	0.0022083	67	0.302674
ΣT	Zm00001d006701	2	214683529	214685193	+	GRAS-transcription factor 75	GRAS transcription factor [Source:UniProtKB/TrEMBL%3BAcc:C0P6K9]	gene	protein_coding	0.00222939	68	0.307192
ΣT	Zm00001d030149	1	108717575	108726921	-		ATP-dependent Clp protease proteolytic subunit	gene	protein_coding	0.00225455	69	0.311709								NAM_JL_4	δT, δT3, γT3, ΣT3, ΣTT3
ΣT	Zm00001d018912	7	9117216	9136917	+	PHD-transcription factor 19	Acyl-CoA N-acyltransferase with RING/FYVE/PHD-type zinc finger protein	gene	protein_coding	0.00225869	70	0.316227
ΣT	Zm00001d045729	9	35624307	35627408	+		Protein NSP-INTERACTING KINASE 1	gene	protein_coding	0.00228872	71	0.320744								NAM_JL_45	αT, δT, γT, ΣT, αT3, δT3, γT3, ΣT3, ΣTT3	9_98832752	0.13	63208445	63205344
ΣT	Zm00001d021948	7	166828550	166830651	+		Probable serine/threonine-protein kinase WNK11	gene	protein_coding	0.00230703	72	0.325262
ΣT	Zm00001d039097	6	169964430	169967225	-		Protein STRUBBELIG-RECEPTOR FAMILY 1	gene	protein_coding	0.00233986	73	0.32978
ΣT	Zm00001d007038	2	220640379	220648182	+		Proteasome subunit alpha type	gene	protein_coding	0.00238261	74	0.334297								NAM_JL_12	αT, δT, γT, ΣT, ΣTT3	2_216582671	0.47	-4057708	-4065511
ΣT	Zm00001d005195	2	163095556	163101315	+		RING/U-box superfamily protein	gene	protein_coding	0.0024027	75	0.338815
ΣT	Zm00001d053316	4	225850593	225868212	-		Casein kinase I isoform delta-like%253B Putative casein kinase family protein	gene	protein_coding	0.00242232	76	0.343332
ΣT	Zm00001d034076	1	283401534	283408034	+		Cyclic nucleotide-gated ion channel 2	gene	protein_coding	0.00242434	77	0.34785
ΣT	Zm00001d024675	10	83281590	83288964	+		RNA-binding (RRM/RBD/RNP motifs) family protein	gene	protein_coding	0.00249776	78	0.352367								NAM_JL_51	αT3, ΣT3
ΣT	Zm00001d042180	3	155197945	155203597	+		VAP27-2	gene	protein_coding	0.00250869	79	0.356885
ΣT	Zm00001d021032	7	140954748	140973549	-		RING/U-box superfamily protein	gene	protein_coding	0.00254742	80	0.361402								NAM_JL_38	αT
ΣT	Zm00001d006705	2	214797523	214800816	+		ARM repeat superfamily protein	gene	protein_coding	0.00259472	81	0.36592
ΣT	Zm00001d007163	2	223621321	223625177	-			gene	protein_coding	0.00263006	82	0.370437								NAM_JL_12	αT, δT, γT, ΣT, ΣTT3	2_216582671	0.47	-7038650	-7042506
ΣT	Zm00001d037199	6	115494237	115498366	+		O-fucosyltransferase family protein	gene	protein_coding	0.00268034	83	0.374955								NAM_JL_31	δT, γT, ΣT, αT3, δT3, ΣTT3	6_120781474	0.37	5287237	5283108
ΣT	Zm00001d031666	1	198113791	198116973	-		Probable aldo-keto reductase 4	gene	protein_coding	0.00269616	84	0.379472
ΣT	Zm00001d006607	2	212378283	212389458	+		HOPM interactor 7	gene	protein_coding	0.00277476	85	0.38399
ΣT	Zm00001d047401	9	128893506	128896643	+		Serine/arginine-rich SC35-like splicing factor SCL33	gene	protein_coding	0.00279241	86	0.388507
ΣT	Zm00001d004463	2	113526922	113567649	+		Sterol 3-beta-glucosyltransferase UGT80A2	gene	protein_coding	0.00281059	87	0.393025								NAM_JL_10	δT, γT, αT3, γT3, ΣT3
ΣT	Zm00001d032146	1	214436611	214438401	-		Calcineurin subunit B	gene	protein_coding	0.00281986	88	0.397542
ΣT	Zm00001d047823	9	142600819	142606209	-		Retrovirus-related Pol polyprotein LINE-1	gene	protein_coding	0.00283766	89	0.40206
ΣT	Zm00001d043026	3	186921101	186922723	-		PLAC8 family protein	gene	protein_coding	0.00284116	90	0.406578								NAM_JL_18	αT, γT, ΣT, δT3	3_193062452	0.08	6141351	6139729
ΣT	Zm00001d048076	9	149401433	149406529	-		myosin-related	gene	protein_coding	0.00288006	91	0.411095
ΣT	Zm00001d046683	9	102308408	102321689	+		Stromal processing peptidase chloroplastic	gene	protein_coding	0.00291125	92	0.415613								NAM_JL_45	αT, δT, γT, ΣT, αT3, δT3, γT3, ΣT3, ΣTT3	9_98832752	0.13	-3475656	-3488937
ΣT	Zm00001d025963	10	134955202	134961784	+		Sphingoid long-chain bases kinase 1	gene	protein_coding	0.00295263	93	0.42013
ΣT	Zm00001d038368	6	155638267	155640737	-		Peptidyl-prolyl cis-trans isomerase	gene	protein_coding	0.00295554	94	0.424648
ΣT	Zm00001d046971	9	113591821	113595110	-		Filamentation temperature-sensitive H 2A isoform 1%253B Filamentation temperature-sensitive H 2A isoform 2%253B Filamentation temperature-sensitive H 2A isoform 3	gene	protein_coding	0.00296831	95	0.429165
ΣT	Zm00001d027286	1	1834232	1835383	+		Flavin-containing monooxygenase FMO GS-OX5	gene	protein_coding	0.00307675	96	0.433683
ΣT	Zm00001d011037	8	137163480	137166111	+		MAP kinase phosphatase isoform 1%253B MAP kinase phosphatase isoform 2	gene	protein_coding	0.00308526	97	0.4382								NAM_JL_41	αT, γT, ΣT, δT3, ΣTT3
ΣT	Zm00001d037604	6	131348955	131353566	-		Ethylene response sensor 1	gene	protein_coding	0.00311078	98	0.442718								NAM_JL_32	αT, γT3, ΣT3, ΣTT3
ΣT	Zm00001d022211	7	172910370	172911336	+			gene	protein_coding	0.00325407	99	0.447235
ΣT	Zm00001d022031	7	168308173	168317920	+			gene	protein_coding	0.00334089	100	0.451753
ΣT	Zm00001d002485	2	13754420	13757455	-		Putative WEB family protein chloroplastic	gene	protein_coding	0.00334579	101	0.45627
ΣT	Zm00001d029343	1	66648726	66655094	+		Probable F-actin-capping protein subunit beta	gene	protein_coding	0.00336096	102	0.460788
ΣT	Zm00001d036770	6	100193953	100197746	+		GDSL esterase/lipase	gene	protein_coding	0.00336589	103	0.465305
ΣT	Zm00001d011458	8	150984719	150988729	+		Protein kinase superfamily protein	gene	protein_coding	0.00338828	104	0.469823
ΣT	Zm00001d036205	6	77009440	77011438	-			gene	protein_coding	0.00349033	105	0.47434								NAM_JL_30	γT, ΣT, δT3, γT3, ΣT3, ΣTT3	6_89292276	0.07	12282836	12280838
ΣT	Zm00001d053528	4	233126072	233126482	-		Cwf21	gene	protein_coding	0.00353021	106	0.478858
ΣT	Zm00001d002024	2	4593403	4606170	+		NADPH--cytochrome P450 reductase 2	gene	protein_coding	0.00357783	107	0.483375
ΣT	Zm00001d023838	10	23887314	23897377	-		Auxilin-related protein 1	gene	protein_coding	0.0035864	108	0.487893								NAM_JL_49	γT, ΣT, δT3, γT3, ΣTT3	10_20537156	0.18	-3350158	-3360221
ΣT	Zm00001d049539	4	33796845	33798491	+		FAD-binding Berberine family protein	gene	protein_coding	0.00361964	109	0.492411								NAM_JL_21	δT, γT, ΣT, αT3, δT3, γT3, ΣT3, ΣTT3	4_29288877	0.34	-4507968	-4509614
ΣT	Zm00001d027896	1	16977162	16980228	-		Proteasome subunit alpha type	gene	protein_coding	0.00363272	110	0.496928								NAM_JL_2	γT, δT3
ΣT3	Zm00001d046558	9	95895575	95899061	+	homogentisate geranylgeranyl transferase1	homogentisate geranylgeranyl transferase1	gene	protein_coding	6.2e-11	1	0.00451753	Yes							NAM_JL_45	αT, δT, γT, ΣT, αT3, δT3, γT3, ΣT3, ΣTT3	9_95962596	0.98	67021	63535
ΣT3	Zm00001d005874	2	191436169	191438639	-			gene	protein_coding	2.89e-06	2	0.00903506								NAM_JL_11	γT, ΣT, ΣTT3
ΣT3	Zm00001d017986	5	211406416	211411375	-	E2F-DP-transcription factor 27	E2F transcription factor-like E2FE	gene	protein_coding	4.02e-06	3	0.0135526
ΣT3	Zm00001d014258	5	38466701	38476589	-	alanine aminotransferase5	alanine aminotransferase5	gene	protein_coding	2.58e-05	4	0.0180701
ΣT3	Zm00001d030379	1	127537249	127540620	-		Deoxyribodipyrimidine photo-lyase	gene	protein_coding	3.24e-05	5	0.0225876								NAM_JL_4	δT, δT3, γT3, ΣT3, ΣTT3	1_80971949	0.27	-46565300	-46568671
ΣT3	Zm00001d009848	8	84947841	84951081	+		60S ribosomal protein L18-3	gene	protein_coding	3.95e-05	6	0.0271052
ΣT3	Zm00001d046555	9	95832622	95834867	-	embryo specific18	embryo specific18	gene	protein_coding	4.13e-05	7	0.0316227								NAM_JL_45	αT, δT, γT, ΣT, αT3, δT3, γT3, ΣT3, ΣTT3	9_95962596	0.98	129974	127729
ΣT3	Zm00001d009010	8	30106964	30108529	-		Plasma membrane-associated cation-binding protein 1	gene	protein_coding	8.05e-05	8	0.0361402
ΣT3	Zm00001d008225	8	1785019	1794777	-	bZIP-transcription factor 72	Transcription factor TGA6	gene	protein_coding	0.000107634	9	0.0406578
ΣT3	Zm00001d016907	5	179669837	179673125	+	E2F-DP-transcription factor 28	Purple acid phosphatase 3	gene	protein_coding	0.000110877	10	0.0451753
ΣT3	Zm00001d041920	3	143644925	143649063	-	bZIP-transcription factor 8	Transcription factor PosF21	gene	protein_coding	0.000113622	11	0.0496928								NAM_JL_14	αT3, δT3, γT3, ΣT3	3_149549629	0.28	5904704	5900566
ΣT3	Zm00001d051219	4	148978271	148980970	-		RNI-like superfamily protein	gene	protein_coding	0.000128848	12	0.0542103								NAM_JL_21	δT, γT, ΣT, αT3, δT3, γT3, ΣT3, ΣTT3	4_44001550	0.09	-104976721	-104979420
ΣT3	Zm00001d018867	7	7839802	7844665	-		Syntaxin 132	gene	protein_coding	0.000139068	13	0.0587279
ΣT3	Zm00001d045063	9	11346646	11348519	+		Cytochrome P450 709B2	gene	protein_coding	0.000163576	14	0.0632454
ΣT3	Zm00001d046613	9	98839260	98845509	+		Elongator complex protein 4	gene	protein_coding	0.000168838	15	0.0677629								NAM_JL_45	αT, δT, γT, ΣT, αT3, δT3, γT3, ΣT3, ΣTT3	9_95962596	0.98	-2876664	-2882913
ΣT3	Zm00001d012689	8	178701046	178703315	-	agrr21	Protein CURVATURE THYLAKOID 1C chloroplastic	gene	protein_coding	0.0001707	16	0.0722804								NAM_JL_43	αT3, δT3, γT3
ΣT3	Zm00001d005666	2	182755798	182758430	+		Pumilio homolog 12	gene	protein_coding	0.000181188	17	0.076798
ΣT3	Zm00001d005684	2	183288690	183291321	+			gene	protein_coding	0.000189584	18	0.0813155
ΣT3	Zm00001d017113	5	185778368	185786205	+			gene	protein_coding	0.000200089	19	0.085833
ΣT3	Zm00001d033400	1	261836342	261838185	+		Metal-dependent protein hydrolase	gene	protein_coding	0.00022534	20	0.0903506								NAM_JL_6	αT3
ΣT3	Zm00001d003709	2	55723782	55724426	+		Cell wall / vacuolar inhibitor of fructosidase 2	gene	protein_coding	0.000230656	21	0.0948681								NAM_JL_10	δT, γT, αT3, γT3, ΣT3	2_43899062	0.21	-11824720	-11825364
ΣT3	Zm00001d009740	8	78864307	78867209	+		Plasminogen activator inhibitor 1 RNA-binding protein	gene	protein_coding	0.000277231	22	0.0993856
ΣT3	Zm00001d033128	1	251575859	251578200	+		60S ribosomal protein L10-3	gene	protein_coding	0.000296811	23	0.103903
ΣT3	Zm00001d025946	10	134457486	134477101	+		Serine/threonine-protein kinase GRIK1	gene	protein_coding	0.000323489	24	0.108421
ΣT3	Zm00001d018259	5	217540268	217543540	-	autophagy12	Autophagy-related 12 variant 1%253B Autophagy-related protein 12	gene	protein_coding	0.000345944	25	0.112938
ΣT3	Zm00001d025846	10	131474854	131478746	-		Beta-glucosidase 47	gene	protein_coding	0.000347658	26	0.117456
ΣT3	Zm00001d020639	7	125925841	125929813	-		Probable GTP diphosphokinase RSH2 chloroplastic	gene	protein_coding	0.000356164	27	0.121973
ΣT3	Zm00001d032788	1	238190770	238192464	-		GDSL esterase/lipase LTL1	gene	protein_coding	0.000363884	28	0.126491								NAM_JL_5	αT, δT, γT, ΣT, δT3, γT3, ΣTT3
ΣT3	Zm00001d008940	8	26144396	26151066	-		ABC transporter D family member 2 chloroplastic	gene	protein_coding	0.000365589	29	0.131008
ΣT3	Zm00001d031737	1	200260170	200262141	-		NC domain-containing protein-related	gene	protein_coding	0.000402355	30	0.135526
ΣT3	Zm00001d038133	6	148944655	148947525	-		Cyclin-U3-1	gene	protein_coding	0.000405285	31	0.140043								NAM_JL_32	αT, γT3, ΣT3, ΣTT3	6_137234579	0.3	-11710076	-11712946
ΣT3	Zm00001d025057	10	102026193	102028561	+		NAD(P)-linked oxidoreductase superfamily protein	gene	protein_coding	0.000418405	32	0.144561								NAM_JL_51	αT3, ΣT3	10_96986729	0.28	-5039464	-5041832
ΣT3	Zm00001d025005	10	99217386	99219471	-	Yucca2	Yucca2	gene	protein_coding	0.00043008	33	0.149078								NAM_JL_51	αT3, ΣT3	10_96986729	0.28	-2230657	-2232742
ΣT3	Zm00001d014617	5	55870950	55872441	-		Xyloglucan endotransglucosylase/hydrolase protein 14	gene	protein_coding	0.000441385	34	0.153596								NAM_JL_25	αT3, ΣT3	5_61111888	0.97	5240938	5239447
ΣT3	Zm00001d005535	2	177655850	177675449	-	aspartate kinase homoserine dehydrogenase2	Bifunctional aspartokinase/homoserine dehydrogenase 2%252C chloroplastic Aspartokinase Homoserine dehydrogenase	gene	protein_coding	0.000442992	35	0.158113
ΣT3	Zm00001d022454	7	178054205	178059227	+		F-box family protein	gene	protein_coding	0.000456323	36	0.162631								NAM_JL_39	αT3
ΣT3	Zm00001d046489	9	92154833	92157937	-			gene	protein_coding	0.000474111	37	0.167149								NAM_JL_45	αT, δT, γT, ΣT, αT3, δT3, γT3, ΣT3, ΣTT3	9_95962596	0.98	3807763	3804659
ΣT3	Zm00001d040593	3	52125428	52128327	+		WAT1-related protein	gene	protein_coding	0.000497201	38	0.171666								NAM_JL_14	αT3, δT3, γT3, ΣT3	3_149549629	0.28	97424201	97421302
ΣT3	Zm00001d020348	7	108322505	108323760	+			gene	protein_coding	0.000501187	39	0.176184
ΣT3	Zm00001d015293	5	82992330	82999777	-		VIN3-like protein 2	gene	protein_coding	0.000503224	40	0.180701
ΣT3	Zm00001d039887	3	17697650	17702661	-		Protein apaG	gene	protein_coding	0.000533282	41	0.185219
ΣT3	Zm00001d054088	4	246271622	246276744	+		Extra-large guanine nucleotide-binding protein 3	gene	protein_coding	0.000551876	42	0.189736
ΣT3	Zm00001d017504	5	197789156	197790037	-		zinc finger (C2H2 type) family protein	gene	protein_coding	0.000555045	43	0.194254								NAM_JL_27	δT
ΣT3	Zm00001d039108	6	170139690	170140607	-		Plant-specific domain TIGR01570 family protein	gene	protein_coding	0.000566016	44	0.198771
ΣT3	Zm00001d014035	5	29983511	29986762	+		Pentatricopeptide repeat-containing protein mitochondrial	gene	protein_coding	0.000570508	45	0.203289								NAM_JL_24	αT, δT, γT, ΣT, δT3, γT3, ΣTT3
ΣT3	Zm00001d028162	1	24771608	24778825	-	sulfate permease1	sulfate permease1	gene	protein_coding	0.000587651	46	0.207806
ΣT3	Zm00001d009510	8	68255301	68258169	-		Eukaryotic aspartyl protease family protein	gene	protein_coding	0.000627285	47	0.212324
ΣT3	Zm00001d019243	7	23656326	23659042	-			gene	protein_coding	0.000633138	48	0.216841								NAM_JL_36	δT, αT3, δT3
ΣT3	Zm00001d028641	1	41589278	41590864	-			gene	protein_coding	0.000651441	49	0.221359
ΣT3	Zm00001d048904	4	7506778	7507584	+			gene	protein_coding	0.000653971	50	0.225876
ΣT3	Zm00001d034410	1	292172345	292176235	+		Type IV inositol polyphosphate 5-phosphatase 7	gene	protein_coding	0.000689143	51	0.230394
ΣT3	Zm00001d015234	5	80281071	80289642	-		Cycloartenol synthase	gene	protein_coding	0.000703329	52	0.234911
ΣT3	Zm00001d052946	4	205821051	205824128	-		OSJNBb0045P24.5 protein	gene	protein_coding	0.00070622	53	0.239429
ΣT3	Zm00001d046549	9	95423390	95429102	-		110 kDa U5 small nuclear ribonucleoprotein component CLO	gene	protein_coding	0.00070914	54	0.243947								NAM_JL_45	αT, δT, γT, ΣT, αT3, δT3, γT3, ΣT3, ΣTT3	9_95962596	0.98	539206	533494
ΣT3	Zm00001d019060	7	14494700	14497925	+	deoxy xylulose synthase 2	deoxy xylulose synthase 2	gene	protein_coding	0.000724984	55	0.248464	Yes							NAM_JL_35	δT3, γT3, ΣT3, ΣTT3	7_14494521	0.94	-179	-3404
ΣT3	Zm00001d045113	9	13149723	13154901	-		Calcineurin-like metallo-phosphoesterase superfamily protein	gene	protein_coding	0.000748075	56	0.252982
ΣT3	Zm00001d052334	4	187337794	187340606	+			gene	protein_coding	0.000757298	57	0.257499
ΣT3	Zm00001d027295	1	2104761	2106624	+	beta tubulin1	beta tubulin1	gene	protein_coding	0.000770719	58	0.262017
ΣT3	Zm00001d029083	1	57394910	57397707	+		alanine--glyoxylate aminotransferase1	gene	protein_coding	0.000800651	59	0.266534
ΣT3	Zm00001d017551	5	199349177	199350492	+		DUF241 domain protein	gene	protein_coding	0.000839157	60	0.271052								NAM_JL_27	δT
ΣT3	Zm00001d039456	3	4838566	4841548	-		RAP	gene	protein_coding	0.000855765	61	0.275569
ΣT3	Zm00001d025580	10	122855595	122861043	-	somatic embryogenesis receptor-like kinase1	somatic embryogenesis receptor-like kinase1	gene	protein_coding	0.000869364	62	0.280087
ΣT3	Zm00001d044216	3	222090042	222095901	+	bHLH-transcription factor 166	Transcription factor bHLH121	gene	protein_coding	0.000869795	63	0.284604
ΣT3	Zm00001d015259	5	81752266	81766811	+		26S proteasome non-ATPase regulatory subunit 2 homolog A	gene	protein_coding	0.000870089	64	0.289122
ΣT3	Zm00001d014950	5	69573089	69578098	+		Peptidase C78 ubiquitin fold modifier-specific peptidase 1/ 2	gene	protein_coding	0.000871277	65	0.293639								NAM_JL_25	αT3, ΣT3	5_61111888	0.97	-8461201	-8466210
ΣT3	Zm00001d010282	8	107273501	107276222	-		Single-stranded nucleic acid binding R3H protein	gene	protein_coding	0.000871929	66	0.298157
ΣT3	Zm00001d008600	8	14146760	14152703	+		Sulfoquinovosyl transferase SQD2	gene	protein_coding	0.000879508	67	0.302674
ΣT3	Zm00001d033402	1	261930159	261931759	-		Os03g0673100 protein	gene	protein_coding	0.000890284	68	0.307192								NAM_JL_6	αT3
ΣT3	Zm00001d039575	3	8204808	8206696	+		1-aminocyclopropane-1-carboxylate oxidase	gene	protein_coding	0.000911024	69	0.311709
ΣT3	Zm00001d007082	2	221854961	221859498	-		Phosphatidylinositol 4-phosphate 5-kinase 6	gene	protein_coding	0.000916356	70	0.316227								NAM_JL_12	αT, δT, γT, ΣT, ΣTT3
ΣT3	Zm00001d052405	4	189190071	189194808	-	WRI1 transcription factor2	WRI1 transcription factor2	gene	protein_coding	0.000920697	71	0.320744
ΣT3	Zm00001d037674	6	133714246	133717685	+	tryptophan aminotransferase related3	Alliin lyase	gene	protein_coding	0.000922501	72	0.325262								NAM_JL_32	αT, γT3, ΣT3, ΣTT3	6_137234579	0.3	3520333	3516894
ΣT3	Zm00001d052234	4	184184459	184186027	-			gene	protein_coding	0.000953056	73	0.32978
ΣT3	Zm00001d008407	8	7956555	7961097	+		Protein RER1B	gene	protein_coding	0.000967558	74	0.334297
ΣT3	Zm00001d045500	9	24646435	24651266	-		ribosomal protein L29 family protein	gene	protein_coding	0.000993375	75	0.338815
ΣT3	Zm00001d013228	5	6770365	6773482	+		TIP41-like family protein	gene	protein_coding	0.00102394	76	0.343332
ΣT3	Zm00001d011891	8	164106171	164115399	-		S-formylglutathione hydrolase	gene	protein_coding	0.0010314	77	0.34785
ΣT3	Zm00001d018704	7	2767046	2847029	+			gene	protein_coding	0.00103223	78	0.352367
ΣT3	Zm00001d008273	8	3682734	3687115	-		Alpha-xylosidase 1	gene	protein_coding	0.00103886	79	0.356885
ΣT3	Zm00001d009579	8	71612135	71614100	+		60S ribosomal protein L18a	gene	protein_coding	0.00107075	80	0.361402
ΣT3	Zm00001d036567	6	92808875	92811320	-		40S ribosomal protein S14-3	gene	protein_coding	0.00108039	81	0.36592
ΣT3	Zm00001d024675	10	83281590	83288964	+		RNA-binding (RRM/RBD/RNP motifs) family protein	gene	protein_coding	0.00108089	82	0.370437								NAM_JL_51	αT3, ΣT3	10_96986729	0.28	13705139	13697765
ΣT3	Zm00001d038655	6	161921883	161936270	+		TRAF-like superfamily protein	gene	protein_coding	0.00108567	83	0.374955								NAM_JL_33	δT, γT, ΣT, αT3, δT3
ΣT3	Zm00001d008279	8	3838072	3839316	-		Serine/threonine-protein kinase-like protein	gene	protein_coding	0.00109696	84	0.379472
ΣT3	Zm00001d023439	10	5628583	5632451	+		Ribonuclease H2 subunit A	gene	protein_coding	0.00111771	85	0.38399
ΣT3	Zm00001d038165	6	150159091	150161690	+		Putative GID1-like gibberellin receptor	gene	protein_coding	0.00111844	86	0.388507								NAM_JL_32	αT, γT3, ΣT3, ΣTT3	6_137234579	0.3	-12924512	-12927111
ΣT3	Zm00001d001894	2	2491277	2493876	+		hydroxyproline-rich glycoprotein family protein	gene	protein_coding	0.00113684	87	0.393025
ΣT3	Zm00001d011561	8	154491666	154495115	+		drought-induced 19	gene	protein_coding	0.00119412	88	0.397542
ΣT3	Zm00001d003148	2	33774188	33778057	+		Enhancer of rudimentary homolog	gene	protein_coding	0.00121346	89	0.40206								NAM_JL_10	δT, γT, αT3, γT3, ΣT3	2_43899062	0.21	10124874	10121005
ΣT3	Zm00001d011523	8	153504230	153513873	+		Pentatricopeptide repeat-containing protein	gene	protein_coding	0.00123047	90	0.406578
ΣT3	Zm00001d009222	8	44260856	44269441	-		Pyrophosphate-energized vacuolar membrane proton pump 1	gene	protein_coding	0.00125752	91	0.411095
ΣT3	Zm00001d048361	9	155107951	155110341	+		CSC1-like protein	gene	protein_coding	0.00129977	92	0.415613
ΣT3	Zm00001d017575	5	200157732	200159935	-	C2C2-Dof-transcription factor 22	Dof zinc finger protein DOF2.5	gene	protein_coding	0.00131462	93	0.42013								NAM_JL_27	δT
ΣT3	Zm00001d034160	1	285335178	285337132	+	G2-like-transcription factor 44	DNA binding protein	gene	protein_coding	0.00131669	94	0.424648								NAM_JL_7	αT3
ΣT3	Zm00001d034371	1	291096651	291105612	+		Nuclear pore complex protein NUP1	gene	protein_coding	0.00134296	95	0.429165
ΣT3	Zm00001d007390	2	230555707	230563910	+		Succinate dehydrogenase assembly factor 2 mitochondrial	gene	protein_coding	0.00135364	96	0.433683
ΣT3	Zm00001d009652	8	74457985	74460428	+	acidic ribosomal protein P2a-2	acidic ribosomal protein P2a-2	gene	protein_coding	0.00135415	97	0.4382
ΣT3	Zm00001d019363	7	29849024	29858068	+		Serine/threonine protein phosphatase 2A 59 kDa regulatory subunit B' eta isoform	gene	protein_coding	0.00137123	98	0.442718								NAM_JL_36	δT, αT3, δT3
ΣT3	Zm00001d012652	8	177983385	177988780	+		Signal recognition particle 54 kDa protein 3	gene	protein_coding	0.00137891	99	0.447235								NAM_JL_43	αT3, δT3, γT3
ΣT3	Zm00001d046535	9	94503734	94505652	+		Phosphatidylcholine:diacylglycerol cholinephosphotransferase 1	gene	protein_coding	0.00141246	100	0.451753								NAM_JL_45	αT, δT, γT, ΣT, αT3, δT3, γT3, ΣT3, ΣTT3	9_95962596	0.98	1458862	1456944
ΣT3	Zm00001d046299	9	79124493	79126324	+	HSF-transcription factor 28	HSF28 HSF type transcription factor	gene	protein_coding	0.00142044	101	0.45627								NAM_JL_45	αT, δT, γT, ΣT, αT3, δT3, γT3, ΣT3, ΣTT3	9_95962596	0.98	16838103	16836272
ΣT3	Zm00001d028352	1	31683717	31688115	+		LisH and RanBPM domains containing protein	gene	protein_coding	0.0014255	102	0.460788								NAM_JL_3	αT, δT, γT, ΣT, αT3, ΣTT3
ΣT3	Zm00001d053860	4	242400871	242404592	-		MEI2 C-terminal RRM only like 1	gene	protein_coding	0.00148793	103	0.465305
ΣT3	Zm00001d032101	1	212826023	212863575	-		Formin-like protein 14	gene	protein_coding	0.00152967	104	0.469823
ΣT3	Zm00001d042427	3	166932057	166935803	-		Ribosomal protein S24/S35 mitochondrial	gene	protein_coding	0.00157324	105	0.47434								NAM_JL_15	αT
ΣT3	Zm00001d003220	2	36506464	36511337	-		ATP/GTP binding protein	gene	protein_coding	0.00157468	106	0.478858								NAM_JL_10	δT, γT, αT3, γT3, ΣT3	2_43899062	0.21	7392598	7387725
ΣT3	Zm00001d003200	2	35415696	35425758	-		S-adenosyl-L-methionine-dependent methyltransferases superfamily protein	gene	protein_coding	0.00162431	107	0.483375								NAM_JL_10	δT, γT, αT3, γT3, ΣT3	2_43899062	0.21	8483366	8473304
ΣT3	Zm00001d019279	7	25301424	25304588	+	cytidine deaminase1	Cytidine/deoxycytidylate deaminase family protein%253B Putative cytidine deaminase	gene	protein_coding	0.00164376	108	0.487893								NAM_JL_36	δT, αT3, δT3
ΣT3	Zm00001d045123	9	13588271	13591170	-		TRF-like 5	gene	protein_coding	0.00168481	109	0.492411
ΣT3	Zm00001d036565	6	92667282	92669971	-		40S ribosomal protein S14-3	gene	protein_coding	0.00169852	110	0.496928
ΣTT3	Zm00001d032576	1	231120510	231123615	-	GRMZM2G036455	Protochlorophyllide reductase C chloroplastic	gene	protein_coding	2.21e-06	1	0.00451753	Yes							NAM_JL_5	αT, δT, γT, ΣT, δT3, γT3, ΣTT3	1_231643164	0.67	522654	519549
ΣTT3	Zm00001d013937	5	25431430	25434346	-	GRMZM2G073351	Protochlorophyllide reductase C chloroplastic	gene	protein_coding	4.13e-06	2	0.00903506	Yes	ΣTT3_25	8.37e-08	1	8.32041e-06	3519	603	NAM_JL_24	αT, δT, γT, ΣT, δT3, γT3, ΣTT3	5_25435977	0.36	4547	1631
ΣTT3	Zm00001d021244	7	146789970	146799955	-			gene	protein_coding	1e-05	3	0.0135526		ΣTT3_35	0.0226464	557	0.00463447	-27726	-37711
ΣTT3	Zm00001d032566	1	230666267	230672973	-			gene	protein_coding	1.12e-05	4	0.0180701								NAM_JL_5	αT, δT, γT, ΣT, δT3, γT3, ΣTT3	1_231643164	0.67	976897	970191
ΣTT3	Zm00001d016581	5	168223687	168255407	+		DNA polymerase epsilon catalytic subunit A	gene	protein_coding	3.58e-05	5	0.0225876
ΣTT3	Zm00001d049624	4	37970635	37973407	-		Magnesium transporter CorA-like family protein	gene	protein_coding	5.19e-05	6	0.0271052								NAM_JL_21	δT, γT, ΣT, αT3, δT3, γT3, ΣT3, ΣTT3	4_43284283	0.57	5313648	5310876
ΣTT3	Zm00001d044017	3	216717307	216725476	-		Probable plastid-lipid-associated protein 14 chloroplastic	gene	protein_coding	5.42e-05	7	0.0316227
ΣTT3	Zm00001d032948	1	244409830	244413837	-		3-ketoacyl-CoA synthase	gene	protein_coding	5.57e-05	8	0.0361402
ΣTT3	Zm00001d033237	1	255361226	255391452	-		Uncharacterised conserved protein UCP031088 alpha/beta hydrolase	gene	protein_coding	8.72e-05	9	0.0406578
ΣTT3	Zm00001d053860	4	242400871	242404592	-		MEI2 C-terminal RRM only like 1	gene	protein_coding	0.00011908	10	0.0451753
ΣTT3	Zm00001d024675	10	83281590	83288964	+		RNA-binding (RRM/RBD/RNP motifs) family protein	gene	protein_coding	0.000135518	11	0.0496928								NAM_JL_51	αT3, ΣT3
ΣTT3	Zm00001d013933	5	25177803	25179923	-		CBS domain-containing protein CBSX5	gene	protein_coding	0.000143184	12	0.0542103								NAM_JL_24	αT, δT, γT, ΣT, δT3, γT3, ΣTT3	5_25435977	0.36	258174	256054
ΣTT3	Zm00001d002685	2	19212994	19214316	-		Thioredoxin-like 3-3	gene	protein_coding	0.000154154	13	0.0587279
ΣTT3	Zm00001d009648	8	74317968	74318441	-		Oleosin Bn-V	gene	protein_coding	0.000212171	14	0.0632454
ΣTT3	Zm00001d022211	7	172910370	172911336	+			gene	protein_coding	0.000223448	15	0.0677629
ΣTT3	Zm00001d010459	8	116264102	116265454	+		Putative CBL-interacting protein kinase family protein	gene	protein_coding	0.000248018	16	0.0722804
ΣTT3	Zm00001d021032	7	140954748	140973549	-		RING/U-box superfamily protein	gene	protein_coding	0.000366888	17	0.076798								NAM_JL_38	αT
ΣTT3	Zm00001d008591	8	13719470	13722383	-		Octicosapeptide/Phox/Bem1p family protein	gene	protein_coding	0.000427185	18	0.0813155		ΣTT3_37	0.0791445	1156	0.00961839	-28674	-31587
ΣTT3	Zm00001d032424	1	225982558	225987682	+		Probable sodium/metabolite cotransporter BASS1 chloroplastic	gene	protein_coding	0.000453726	19	0.085833								NAM_JL_5	αT, δT, γT, ΣT, δT3, γT3, ΣTT3	1_231643164	0.67	5660606	5655482
ΣTT3	Zm00001d002860	2	24851162	24854883	-		Expansin-B3	gene	protein_coding	0.000455234	20	0.0903506								NAM_JL_9	ΣT
ΣTT3	Zm00001d006705	2	214797523	214800816	+		ARM repeat superfamily protein	gene	protein_coding	0.000465994	21	0.0948681
ΣTT3	Zm00001d007471	2	232434738	232435620	+			gene	protein_coding	0.000546737	22	0.0993856
ΣTT3	Zm00001d039097	6	169964430	169967225	-		Protein STRUBBELIG-RECEPTOR FAMILY 1	gene	protein_coding	0.000556945	23	0.103903
ΣTT3	Zm00001d011561	8	154491666	154495115	+		drought-induced 19	gene	protein_coding	0.000563651	24	0.108421
ΣTT3	Zm00001d006437	2	208168131	208169072	+		Monothiol glutaredoxin-S17	gene	protein_coding	0.00059114	25	0.112938
ΣTT3	Zm00001d033981	1	279982395	279986186	-	ATP sulfurylase1	ATP sulfurylase1	gene	protein_coding	0.000613329	26	0.117456
ΣTT3	Zm00001d015293	5	82992330	82999777	-		VIN3-like protein 2	gene	protein_coding	0.000640878	27	0.121973
ΣTT3	Zm00001d023258	10	1497523	1503954	-		Calcium-transporting ATPase 4 plasma membrane-type	gene	protein_coding	0.000668752	28	0.126491
ΣTT3	Zm00001d005006	2	153444868	153448483	+		nucleotide sugar transporter-KT 1	gene	protein_coding	0.000671846	29	0.131008								NAM_JL_10	δT, γT, αT3, γT3, ΣT3
ΣTT3	Zm00001d021445	7	152358112	152359792	-		60S ribosomal protein L14-1	gene	protein_coding	0.000686221	30	0.135526
ΣTT3	Zm00001d039378	3	2791183	2793926	+			gene	protein_coding	0.000689527	31	0.140043
ΣTT3	Zm00001d034198	1	286411877	286413004	+		Protein PHLOEM PROTEIN 2-LIKE A10	gene	protein_coding	0.000710742	32	0.144561
ΣTT3	Zm00001d021948	7	166828550	166830651	+		Probable serine/threonine-protein kinase WNK11	gene	protein_coding	0.000736182	33	0.149078
ΣTT3	Zm00001d015260	5	81788079	81795079	+		DNA-binding protein BIN4	gene	protein_coding	0.000751496	34	0.153596
ΣTT3	Zm00001d014325	5	41050430	41054227	+		Calcium-binding EF-hand family protein	gene	protein_coding	0.000761012	35	0.158113
ΣTT3	Zm00001d010988	8	136011962	136013101	+			gene	protein_coding	0.000803763	36	0.162631								NAM_JL_41	αT, γT, ΣT, δT3, ΣTT3	8_148002256	0.21	11990294	11989155
ΣTT3	Zm00001d045729	9	35624307	35627408	+		Protein NSP-INTERACTING KINASE 1	gene	protein_coding	0.000820318	37	0.167149								NAM_JL_45	αT, δT, γT, ΣT, αT3, δT3, γT3, ΣT3, ΣTT3	9_94142626	0.18	58518319	58515218
ΣTT3	Zm00001d040941	3	81369102	81382294	-		Chaperone protein dnaJ 50	gene	protein_coding	0.000846557	38	0.171666								NAM_JL_14	αT3, δT3, γT3, ΣT3
ΣTT3	Zm00001d030618	1	148822878	148823223	-		Cytochrome c oxidase subunit 5C	gene	protein_coding	0.000901411	39	0.176184								NAM_JL_4	δT, δT3, γT3, ΣT3, ΣTT3	1_174840154	0.18	26017276	26016931
ΣTT3	Zm00001d052334	4	187337794	187340606	+			gene	protein_coding	0.000920614	40	0.180701
ΣTT3	Zm00001d023492	10	7294593	7311266	-		RING/FYVE/PHD zinc finger superfamily protein	gene	protein_coding	0.000923005	41	0.185219								NAM_JL_48	αT3
ΣTT3	Zm00001d047713	9	139754473	139758419	-		Eukaryotic translation initiation factor 2 subunit alpha	gene	protein_coding	0.000980576	42	0.189736								NAM_JL_46	γT, ΣT
ΣTT3	Zm00001d008382	8	6829899	6834351	-		Cationic amino acid transporter 6 chloroplastic	gene	protein_coding	0.00102291	43	0.194254
ΣTT3	Zm00001d012884	5	1587906	1593592	+		FAD/NAD(P)-binding oxidoreductase family protein	gene	protein_coding	0.00106065	44	0.198771								NAM_JL_23	δT3, ΣTT3	5_2340670	0.14	752764	747078
ΣTT3	Zm00001d025706	10	126880549	126888843	-	CRM family member6	RNA-binding CRS1 / YhbY (CRM) domain protein	gene	protein_coding	0.00111959	45	0.203289
ΣTT3	Zm00001d003374	2	42062511	42064978	+			gene	protein_coding	0.00114635	46	0.207806								NAM_JL_10	δT, γT, αT3, γT3, ΣT3
ΣTT3	Zm00001d033493	1	264224149	264230819	+		Cationic amino acid transporter 4 vacuolar	gene	protein_coding	0.00124323	47	0.212324								NAM_JL_6	αT3
ΣTT3	Zm00001d049253	4	22955772	22957129	+		40S ribosomal protein S4-3	gene	protein_coding	0.00124347	48	0.216841
ΣTT3	Zm00001d012274	8	171718376	171721067	+		hydroxycinnamoyltransferase10	gene	protein_coding	0.00125005	49	0.221359
ΣTT3	Zm00001d033400	1	261836342	261838185	+		Metal-dependent protein hydrolase	gene	protein_coding	0.00128086	50	0.225876								NAM_JL_6	αT3
ΣTT3	Zm00001d032831	1	239609852	239611554	-		Ubiquitin-conjugating enzyme E2 4	gene	protein_coding	0.00130491	51	0.230394								NAM_JL_5	αT, δT, γT, ΣT, δT3, γT3, ΣTT3	1_231643164	0.67	-7966688	-7968390
ΣTT3	Zm00001d046772	9	105169464	105172457	+		Putative O-Glycosyl hydrolase superfamily protein	gene	protein_coding	0.00131712	52	0.234911								NAM_JL_45	αT, δT, γT, ΣT, αT3, δT3, γT3, ΣT3, ΣTT3	9_94142626	0.18	-11026838	-11029831
ΣTT3	Zm00001d040279	3	35510649	35520277	-	topless-related1	topless-related1	gene	protein_coding	0.00136557	53	0.239429								NAM_JL_14	αT3, δT3, γT3, ΣT3
ΣTT3	Zm00001d037674	6	133714246	133717685	+	tryptophan aminotransferase related3	Alliin lyase	gene	protein_coding	0.00137266	54	0.243947								NAM_JL_32	αT, γT3, ΣT3, ΣTT3	6_132532291	0.06	-1181955	-1185394
ΣTT3	Zm00001d009212	8	43471863	43480271	-		dihydrolipoyl dehydrogenases	gene	protein_coding	0.00138218	55	0.248464
ΣTT3	Zm00001d009765	8	80235664	80240611	-			gene	protein_coding	0.001428	56	0.252982
ΣTT3	Zm00001d042180	3	155197945	155203597	+		VAP27-2	gene	protein_coding	0.0014455	57	0.257499
ΣTT3	Zm00001d002819	2	23558116	23563958	+	autophagy13c	Autophagy-related protein 13a	gene	protein_coding	0.00146384	58	0.262017								NAM_JL_9	ΣT
ΣTT3	Zm00001d045053	9	11184015	11184376	+		60S ribosomal protein L35a-2	gene	protein_coding	0.00153397	59	0.266534
ΣTT3	Zm00001d044034	3	217295175	217295784	-		DUF538 family protein	gene	protein_coding	0.00155455	60	0.271052
ΣTT3	Zm00001d008968	8	27760205	27761182	+	AP2-EREBP-transcription factor 96	Putative AP2/EREBP transcription factor superfamily protein	gene	protein_coding	0.00165104	61	0.275569
ΣTT3	Zm00001d010062	8	97855255	97858701	-		Rop guanine nucleotide exchange factor 7	gene	protein_coding	0.0016578	62	0.280087
ΣTT3	Zm00001d047003	9	114946402	114947166	-			gene	protein_coding	0.00175648	63	0.284604
ΣTT3	Zm00001d047823	9	142600819	142606209	-		Retrovirus-related Pol polyprotein LINE-1	gene	protein_coding	0.00176732	64	0.289122
ΣTT3	Zm00001d040260	3	34385034	34385420	-		MFS18 protein	gene	protein_coding	0.00179604	65	0.293639								NAM_JL_14	αT3, δT3, γT3, ΣT3
ΣTT3	Zm00001d049254	4	22959532	22960567	+		DEAD-box ATP-dependent RNA helicase 7	gene	protein_coding	0.00181152	66	0.298157
ΣTT3	Zm00001d029340	1	66592542	66594846	+		40S ribosomal protein S9-2	gene	protein_coding	0.00182897	67	0.302674
ΣTT3	Zm00001d039989	3	21877778	21879721	-	AP2-EREBP-transcription factor 192		gene	protein_coding	0.00186259	68	0.307192								NAM_JL_13	γT, ΣT
ΣTT3	Zm00001d051594	4	164049037	164049507	-			gene	protein_coding	0.00191781	69	0.311709
ΣTT3	Zm00001d007118	2	222719142	222722663	+		V-type proton ATPase subunit F	gene	protein_coding	0.00194816	70	0.316227								NAM_JL_12	αT, δT, γT, ΣT, ΣTT3	2_216888260	0.38	-5830882	-5834403
ΣTT3	Zm00001d053676	4	238814470	238849085	-		Putative STRUBBELIG family receptor protein kinase	gene	protein_coding	0.00202771	71	0.320744
ΣTT3	Zm00001d031666	1	198113791	198116973	-		Probable aldo-keto reductase 4	gene	protein_coding	0.00205259	72	0.325262
ΣTT3	Zm00001d043232	3	192594531	192596281	-		Early nodulin-like protein 3	gene	protein_coding	0.00211205	73	0.32978								NAM_JL_18	αT, γT, ΣT, δT3
ΣTT3	Zm00001d028162	1	24771608	24778825	-	sulfate permease1	sulfate permease1	gene	protein_coding	0.00214069	74	0.334297
ΣTT3	Zm00001d048271	9	153586355	153591283	+		Proteasome subunit alpha type	gene	protein_coding	0.00215033	75	0.338815
ΣTT3	Zm00001d017986	5	211406416	211411375	-	E2F-DP-transcription factor 27	E2F transcription factor-like E2FE	gene	protein_coding	0.00215824	76	0.343332
ΣTT3	Zm00001d035115	6	5904499	5909575	-	multidrug and toxic compound extrusion1	multidrug and toxic compound extrusion1	gene	protein_coding	0.00219378	77	0.34785
ΣTT3	Zm00001d026382	10	144818522	144822103	-		G-type lectin S-receptor-like serine/threonine-protein kinase B120	gene	protein_coding	0.00220263	78	0.352367								NAM_JL_52	δT, γT, ΣT, ΣTT3	10_145879135	0.3	1060613	1057032
ΣTT3	Zm00001d022027	7	168263270	168265912	-			gene	protein_coding	0.00224213	79	0.356885
ΣTT3	Zm00001d045537	9	25841071	25846296	-		CYCLOPS	gene	protein_coding	0.00225188	80	0.361402
ΣTT3	Zm00001d008752	8	18999372	19006082	-		Calcium-dependent lipid-binding (CaLB domain) family protein	gene	protein_coding	0.00226965	81	0.36592
ΣTT3	Zm00001d023838	10	23887314	23897377	-		Auxilin-related protein 1	gene	protein_coding	0.00228416	82	0.370437								NAM_JL_49	γT, ΣT, δT3, γT3, ΣTT3	10_11803189	0.05	-12084125	-12094188
ΣTT3	Zm00001d042395	3	164412499	164415646	-		Mitochondrial import inner membrane translocase subunit TIM16	gene	protein_coding	0.0023237	83	0.374955								NAM_JL_15	αT
ΣTT3	Zm00001d007965	2	244301133	244307913	+		mitogen-activated protein kinase kinase kinase 5	gene	protein_coding	0.00232588	84	0.379472
ΣTT3	Zm00001d048361	9	155107951	155110341	+		CSC1-like protein	gene	protein_coding	0.00233176	85	0.38399
ΣTT3	Zm00001d013540	5	13929594	13945018	+		E3 ubiquitin-protein ligase UPL7	gene	protein_coding	0.00234133	86	0.388507
ΣTT3	Zm00001d030379	1	127537249	127540620	-		Deoxyribodipyrimidine photo-lyase	gene	protein_coding	0.00235695	87	0.393025								NAM_JL_4	δT, δT3, γT3, ΣT3, ΣTT3	1_174840154	0.18	47302905	47299534
ΣTT3	Zm00001d022475	7	178358854	178366543	-			gene	protein_coding	0.0023576	88	0.397542
ΣTT3	Zm00001d040513	3	47623384	47630229	-			gene	protein_coding	0.00236771	89	0.40206								NAM_JL_14	αT3, δT3, γT3, ΣT3
ΣTT3	Zm00001d036537	6	91400310	91405273	-		Pyrophosphate--fructose 6-phosphate 1-phosphotransferase subunit alpha 2	gene	protein_coding	0.00243073	90	0.406578		ΣTT3_31	0.14367	1494	0.0124307	100964	96001	NAM_JL_30	γT, ΣT, δT3, γT3, ΣT3, ΣTT3	6_73625378	0.22	-17774932	-17779895
ΣTT3	Zm00001d037684	6	133964806	133965066	-			gene	protein_coding	0.00243452	91	0.411095								NAM_JL_32	αT, γT3, ΣT3, ΣTT3	6_132532291	0.06	-1432515	-1432775
ΣTT3	Zm00001d018891	7	8478320	8494304	-	chloroplast RNA processing4	chloroplast RNA processing4	gene	protein_coding	0.002458	92	0.415613
ΣTT3	Zm00001d051691	4	166839700	166841181	+		DUF506 family protein	gene	protein_coding	0.00246237	93	0.42013
ΣTT3	ZeamMp124	Mt	339779	340135	+		orf118	gene	protein_coding	0.00252914	94	0.424648
ΣTT3	Zm00001d043158	3	190365000	190368453	-	beta tubulin6b	beta tubulin6b	gene	protein_coding	0.00253614	95	0.429165								NAM_JL_18	αT, γT, ΣT, δT3
ΣTT3	Zm00001d025005	10	99217386	99219471	-	Yucca2	Yucca2	gene	protein_coding	0.00259162	96	0.433683								NAM_JL_51	αT3, ΣT3
ΣTT3	Zm00001d013996	5	27841955	27848005	-		Syntaxin-41	gene	protein_coding	0.00262658	97	0.4382								NAM_JL_24	αT, δT, γT, ΣT, δT3, γT3, ΣTT3	5_25435977	0.36	-2405978	-2412028
ΣTT3	Zm00001d002103	2	5981831	5989287	-		3-oxoacyl-[acyl-carrier-protein] synthase III chloroplastic	gene	protein_coding	0.00263269	98	0.442718
ΣTT3	Zm00001d018131	5	214945228	214948102	-		Chaperone protein dnaJ	gene	protein_coding	0.00271623	99	0.447235
ΣTT3	Zm00001d016286	5	155680713	155697788	-		haloacid dehalogenase-like hydrolase family protein	gene	protein_coding	0.00283246	100	0.451753								NAM_JL_26	δT, γT, ΣT, δT3, γT3, ΣT3, ΣTT3	5_93326739	0.57	-62353974	-62371049
ΣTT3	Zm00001d022155	7	171391092	171396068	+		Leucine-rich repeat transmembrane protein kinase 1-like protein	gene	protein_coding	0.00287429	101	0.45627
ΣTT3	Zm00001d011358	8	148347246	148348913	-		Putative RING zinc finger domain superfamily protein	gene	protein_coding	0.00287969	102	0.460788								NAM_JL_41	αT, γT, ΣT, δT3, ΣTT3	8_148002256	0.21	-344990	-346657
ΣTT3	Zm00001d051214	4	148918694	148925044	+	nitrilase2	nitrilase2	gene	protein_coding	0.00292593	103	0.465305								NAM_JL_21	δT, γT, ΣT, αT3, δT3, γT3, ΣT3, ΣTT3	4_43284283	0.57	-105634411	-105640761
ΣTT3	Zm00001d005195	2	163095556	163101315	+		RING/U-box superfamily protein	gene	protein_coding	0.0029437	104	0.469823
ΣTT3	Zm00001d025694	10	126527371	126529992	+		Surfeit locus protein 2 (SURF2)	gene	protein_coding	0.00299118	105	0.47434
ΣTT3	Zm00001d047911	9	145078478	145081740	+		HVA22-like protein i	gene	protein_coding	0.00303373	106	0.478858
ΣTT3	Zm00001d013667	5	16891018	16894241	+		Methyl-CpG-binding domain-containing protein 11	gene	protein_coding	0.00313095	107	0.483375								NAM_JL_24	αT, δT, γT, ΣT, δT3, γT3, ΣTT3	5_25435977	0.36	8544959	8541736
ΣTT3	Zm00001d002485	2	13754420	13757455	-		Putative WEB family protein chloroplastic	gene	protein_coding	0.00313184	108	0.487893
ΣTT3	Zm00001d025946	10	134457486	134477101	+		Serine/threonine-protein kinase GRIK1	gene	protein_coding	0.0031657	109	0.492411
ΣTT3	Zm00001d019824	7	65871026	65877006	-		Polyadenylate-binding protein 2	gene	protein_coding	0.00322276	110	0.496928								NAM_JL_36	δT, αT3, δT3
